# Supplementary material
Source: PubMed Central journal article supplement (PMC4625669)
Supplement: ASN.2014080759_ASN2014080759SupplementaryData.pdf [file ASN.2014080759_ASN2014080759SupplementaryData.pdf]

# **A Grainyhead-Like 2/Ovo-Like 2 Pathway Regulates Renal Epithelial Barrier Function and Lumen Expansion**

**Annekatriin Aue,<sup>\*†</sup> Christian Hinze,<sup>\*\*</sup> Katharina Walentin,<sup>\*</sup> Janett Ruffert,<sup>\*</sup> Yesim Yurtdas,<sup>\*§|</sup>  
Max Werth,<sup>\*</sup> Wei Chen,<sup>\*</sup> Anja Rabien,<sup>§|</sup> Ergin Kilic,<sup>\*\*</sup> Jörg-Dieter Schulzke,<sup>††</sup>  
Michael Schumann,<sup>††</sup> and Kai M. Schmidt-Ott<sup>\*††</sup>**

<sup>\*</sup>Max Delbrueck Center for Molecular Medicine, Berlin, Germany; <sup>†</sup> Experimental and Clinical Research Center, and Departments of <sup>‡</sup> Nephrology, <sup>§</sup> Urology, <sup>\*\*</sup>Pathology, and <sup>††</sup> Gastroenterology, Charité Medical University, Berlin, Germany; <sup>|</sup> Berlin Institute of Urologic Research, Berlin, Germany

A.A. and C.H. contributed equally to this work

#Corresponding author:

Prof. Dr. Kai M. Schmidt-Ott

Max Delbrueck Center for Molecular Medicine

Robert-Rössle-Str 10

13125 Berlin, Germany

Phone: +49 30 9406 2512

Fax: +49 30 9406 2536

Email: [kai.schmidt-ott@charite.de](mailto:kai.schmidt-ott@charite.de)

## Supplements

|                                                                                                                                   |    |
|-----------------------------------------------------------------------------------------------------------------------------------|----|
| Materials and Methods.....                                                                                                        | 3  |
| Supplemental Figure 1 Grhl2 binding through ChIP-seq and derived target genes by combining ChIP-seq and gene expression data..... | 10 |
| Supplemental Figure 2 Validation of IMCD-3 Grhl2-KD cells.....                                                                    | 11 |
| Supplemental Figure 3 Grhl2 ChIP tracks at selected core targets and EMT genes .....                                              | 13 |
| Supplemental Figure 4 Characterization of IMCD-3 Grhl2-KD cysts at several time points.....                                       | 14 |
| Supplemental Figure 5 Validation of IMCD-3 Grhl2-KD;Ovol2-Res cells.....                                                          | 16 |
| Supplemental Table 1 Differentially expressed genes between Grhl2-Con and Grhl2-KD.....                                           | 17 |
| Supplemental Table 2 Gene ontology analysis on differentially expressed genes.....                                                | 27 |
| Supplemental Table 3 Grhl2 core target module.....                                                                                | 35 |
| Supplemental Table 4 Primers used for quantitative RT-PCR.....                                                                    | 37 |
| Supplemental Table 5 Primers used for quantitative ChIP-PCR.....                                                                  | 37 |
| Supplemental References.....                                                                                                      | 38 |

## **Materials and Methods**

### **Human tissue samples**

Paraffin material was chosen from the archive of the Institute of Pathology of the Charité Berlin and used when adequate tissue was available. The study was undertaken according to approved institutional review board protocols. It was conducted within the framework of the declaration of Helsinki.

### **Mouse nephric duct samples**

Paraffin-embedded E10.0 embryos were cut into 5µm sections. For lumen area quantification, HE stained sections were analyzed at the level of the posterior part of the mesonephros where mesonephric tubules were visible but not connected to the nephric duct. The measurements were performed using ImageJ.

### **Antibodies**

The following antibodies were used: Anti-Grhl2 (HPA004820, Sigma-Aldrich, Munich, Germany), anti-Aquaporin 2 (SC-9882, Santa Cruz Biotechnology, Heidelberg, Germany), Anti-Podocalyxin (AF1556, R&D Systems, Abingdon, United Kingdom), Anti- $\alpha$ -Tubulin (T9026, SIGMA-Aldrich), Anti-Claudin4 (36-4800, Life technologies, Darmstadt, Germany), Anti-E-Cadherin (610182, BD Bioscience, Heidelberg, Germany), Anti-Par-3 (07-330, Merck Millipore, Darmstadt, Germany), Anti-Rab25 (R8407, SIGMA-Aldrich), Anti- $\beta$ -Catenin (610154, BD Bioscience) and Anti-Cytokeratin 8 (TROMA-I, Developmental Studies Hybridoma Bank, DSHB), that was developed by Philippe Broulet and Rolf Kemler under the auspices of the NICHD and maintained by the University of Iowa, Department of Biology, Iowa City.

### **Cloning procedure/ lentiviral particles**

All plasmids for the production of lentiviral particles were purchased from Addgene (Cambridge, USA) Lentiviral particles were generated using the 2nd generation packaging system, comprising the envelope plasmid psPAX2 (Addgene plasmid 12260) and packaging plasmid pMD2.G (Addgene plasmid 12259) established in the laboratories of Didier Trono (EPFL, Lausanne, Switzerland).<sup>1</sup> The Wiznerowicz laboratories (lentiweb.com) provided protocols for the production

and titration of lentiviral particles. To establish a lentiviral mediated KD of Grhl2, H1 promoter-shRNA cassettes were cloned from pSUPER directly into the vector plasmid pLVTHM (Addgene plasmid 12247) using EcoRI and ClaI restriction sites. shRNAs directed against Grhl2 target the sequence 5'-GACTTCCCCTGATGATTCA-3'. A shRNA targeting 5'-CATCACGTACGCGGAATACT-3' of firefly luciferase was used as a negative control.

Full-length cDNA of Cldn4 and Rab25 were amplified from IMCD3 cDNA using Phusion High-Fidelity DNA Polymerase (New England BioLabs, Frankfurt am Main, Germany). Full-length cDNA of Ovol2A was generated from cDNA of wild-type kidney. The coding sequence of Cdh1 was kindly provided from the Daniel Besser laboratories.<sup>2</sup> A Grhl2 rescue construct, which is resistant to the Grhl2-shRNA was generated in our lab.<sup>3</sup> We used full-length cDNA of click beetle luciferase as control cDNA. Vector plasmid pLVUT-tTR-KRAB (Addgene plasmid 11651) was utilized to produce lentiviral particles to integrate expression cassettes of cDNAs in IMCD3 Grhl2-KD cells. The GFP-EMCV IRES-tetR-KRAB domain was replaced by cDNA-IRES-mCherry.

#### **Cell culture/ three-dimensional (3D) cultivation of IMCD-3 cells**

IMCD-3 cells were purchased from ATCC (CRL-2123, Manassas, USA) and maintained in DMEM+GlutaMAX (Life technologies) supplemented with 10% fetal bovine serum (FBS) and penicillin/ streptomycin (100 Units/ ml/ 100 µg/ ml). Cells were sub-cultured two to three times per week in a ratio of 1:4 to 1:8 using 0.25% trypsin, 0.5 mM EDTA in 1xPBS.

IMCD3 cells were transduced with lentiviral particles generated from pLVTHMshRNA at a multiplicity of infection (MOI) of 5. At the same time cells were infected with a second type of lentiviral particle, generated from pLVUT-cDNA-mCherry (MOI of 0.5). Cells were expanded for at least six days and EGFP- and mCherry-expressing cells were isolated using Fluorescence-activated cell sorting (FACS, BD FACSAriaII, BD Biosciences).

For 3D cultivation, IMCD-3 Grhl2-Con, Grhl2-KD, Grhl2-KD;Grhl2-Res were trypsinized and centrifuged to remove the complete growth medium. A suspension of  $1.5 \times 10^4$  cells in 150µl serum-free medium were given to 150 µl Matrigel (Basement Membrane Matrix, BD Biosciences) and plated in Nunc<sup>®</sup> LabTek<sup>®</sup> 8-well chamber slides (Thermo Fisher Scientific, Bonn, Germany). After incubation for 30 min at 37°C complete growth medium was added to cover the Matrigel. Medium

was changed every second day.

### **RNA extraction and cDNA synthesis**

RNA was extracted from IMCD-3 cells using RNeasy Mini-kit (Qiagen, Hilden, Germany) according to manufacturer's instructions including treatment with RNase-free DNase I (Qiagen). 500 ng total RNA of each sample was utilized for cDNA synthesis using RevertAid First Strand cDNA Synthesis Kit (Fermentas, St. Leon-Rot, Germany) according to manufacturer's instructions.

### **Real-time PCR**

Quantitative Real-time PCR was performed using FastStart Universal SYBR Green Master (Rox) (Roche Diagnostics, Mannheim, Germany) with cDNA as template and the primers listed in Table S4. Relative mRNA expression was normalized to  $\beta$ -actin and calculated according to  $\Delta\Delta C_t$  method.

### **Microarray**

Illumina TotalPrep RNA Amplification kit (Life technologies) was used to synthesis cRNA out of RNA isolated from IMCD3 cells according to manufacturer's instructions. Quality of RNA and cRNA was evaluated using Agilent 2100 Bioanalyzer and the Agilent RNA 6000 Nano kit (Agilent Technologies, Böblingen, Germany). We used MouseWG-6 v2.0 Expression BeadChips (Illumina, Essex, UK) to analyze genome-wide gene expression profiles.

### **Chromatin Immunoprecipitation Sequencing (ChIP-Seq)**

We performed ChIP analysis using an antibody directed against H3K4me3 (pAB-003-010, diagenode, Seraing (Ougrée), Belgium) on IMCD-3 Grhl2-KD and Grhl2-Con using the iDeal ChIP-seq kit (diagenode) according to manufacturer's instructions. The protocol was modified as follows. Cells were grown to confluence and covered with DMEM. Cross-linking was done with 1% formaldehyde on a shaking platform for 10 min at room temperature (RT). The reaction was quenched with 125 mM glycine. DMEM was removed from the plates and cells were washed with ice-cold 1xPBS than following the kit's manual. ChIP experiments were performed on IMCD-3 cells, embryonic (embryonic day E15.5) and adult kidney of mice using an antibody against Grhl2. IMCD-3 cells were grown to 100% confluence,  $5 \times 10^6$  cells were cross-linked with 1% formaldehyde for 20 min at room temperature (RT). Kidneys were cut into small pieces and

homogenized in Lysis Buffer (15mM HEPES (pH=7.8), 1.5 mM MgCl<sub>2</sub>, 10 mM KCl, 1 mM EDTA, 1 mM DTT, 10% Glycerol) with 0.5% IGEPAL and proteinase inhibitors. Nuclei were fixed in Lysis Buffer with 1% formaldehyde for 20 min (RT). Chromatin was fragmented to an average size of 300-500 bp. Chromatin (100 µg) and 5 µg of antibody was used per assay using Chromatin Immunoprecipitation (ChIP) Assay Kit (Merck Millipore, Darmstadt, Germany). IP'd DNA concentration was determined using the Qubit system (Qubit ds DNA HS Assay kit, Molecular probes/ Life Technologies) and quality was controlled using Agilent 2100 Bioanalyzer and the Agilent High Sensitivity DNA kit (Agilent Technologies). For library preparation the TruSeq ChIP-Seq Sample Prep Kit (illumina) was used according to manufacturer's instructions. Flow cell was sequenced using illumina HiSeq 2000 (50 bp reads). Primers used for quantitative ChIP-PCR are listed in Table S5.

### **Immunofluorescence/ immunohistochemical staining**

Immunohistochemical staining on human tissue was performed on 5 µm paraffin-embedded, dewaxed and rehydrated sections. Samples were blocked in 5% bovine serum albumin (BSA) in 1xTBS, 0.025% Tween20 and stained with primary antibodies and secondary antibodies labelled to alkaline phosphatase. Enzyme activity was detected using SIGMA FAST™ Fast Red TR/Naphthol AS-MX Alkaline Phosphatase Substrate Tablets Set (SIGMA-Aldrich) according to manufacturer's instructions.

Embryonic (E18) or adult (P30) kidneys of C57BL/6 mice were cut in slices and fixed in 4% paraformaldehyde (PFA). 16 µm cryosections were incubated with 1% bovine serum albumin (BSA), 0.1% Triton X-100, stained with primary antibodies and secondary antibodies labeled with Cy2, Cy3, Cy5, Alexa488 or Alexa 647 (JacksonImmunoResearch, Newmarket, UK). Staining for Grhl2 required preliminary treatment with PBS/citric acid (10 mM).

IMCD-3 cysts grown in 3D culture were fixed with 4% PFA for 30 min on ice while rotating gently. After incubation with 50mM NH<sub>4</sub>Cl, cells were permeabilized with 0.5% TritonX-100 in 1xPBS. Cysts were blocked with 1%BSA, 0.25% TritonX-100 in 1xPBS and incubated with primary antibodies and secondary antibodies in combination with nuclei counterstaining substance SYTOX® Green (Life Technologies). Cells were mounted using Dako Mounting Medium (Agilent

Technologies).

Confocal images were obtained with an inverted Zeiss LSM700 (Carl Zeiss Microscopy, Jena, Germany) or TCS SP5 Tandem Microscope (Leica microsystems, Wetzlar, Germany).

### **Western Blot**

Whole-cell lysates of IMCD-3 cells were prepared using RIPA buffer (50 mM Tris-HCl, 150 mM NaCl, 1% IGEPAL, 0.5% sodium deoxycholate, 0.1% SDS, 1X Protease inhibitor from Roche Diagnostics, Mannheim, Germany). Total protein was quantitated using Pierce BCA Protein Assay kit (Thermo Fisher Scientific) according to manufacturer's instructions.

Protein samples were incubated with NuPAGE loading buffer (10%  $\beta$ -mercaptoethanol added) at 95°C for 10 min. For sodium dodecyl sulfate polyacrylamide gel electrophoresis (SDS-PAGE), samples were loaded on Novex Bis-Tris 4-12% precast gels and electrophoresis was performed according to the manufacturer's instructions using MOPS SDS running buffer (50 mM MOPS, 50 mM TrisBase, 3.5 mM SDS, 1.0 mM EDTA) and the XCell SureLock® Mini-Cell (Life technologies). Proteins were transferred onto PVDF membrane using 1.25 mM Bicine, 1.25 mM BisTris, 0.05 mM EDTA, 10% methanol. Blocking was performed in 1xTris-buffered saline (TBS, 50 mM Tris-Cl, pH 7.6, 150 mM NaCl) and 0.05% Tween20. Membranes were incubated with primary antibodies and secondary antibodies conjugated to horseradish peroxidase. Chemiluminescence was detected using the SuperSignal West Femto Chemiluminescent Substrate (Thermo Fisher Scientific). Relative signal intensity was analyzed using Adobe Photoshop.

### **Transepithelial Resistance (TER) Measurements**

IMCD-3 cell were grown on 0.4  $\mu$ m PCF membranes. TER measurements were done using Ussing chambers and chopstick electrodes as described previously.<sup>4</sup> Statistical analysis was done using Student's t-test.

### **Statistical analysis**

Data represent analysis of at least three independent experiments. Statistical analysis was done using Student's t-test or Mann-Whitney-U Test.

### **Microarray data analysis**

After quantile normalization of the data, we considered genes as differentially expressed if a fold

change larger than or equal to 1.4 (control vs. KD) and a p-value less than 0.05 using Student's t test were present. Heatmap visualization of the microarray data was done using MultiExperiment Viewer (<http://www.tm4.org/>). Heatmap visualized data has been maximum normalized on a per-gene basis. Gene names are according to the used Illumina microarray chip (MouseWG-6 v2). A gene was considered “successfully rescued” in one of the rescue constructs, if:

1.) the p-value after t-test control vs. rescue expression values was  $\leq 0.05$  [no significant difference between control and rescue] or

2.) p-value t-test rescue vs. Grhl2-KD  $< 0.05$  and  $\text{average}(\text{rescue})/\text{average}(\text{control}) \geq 1/1.4$  for differential genes downregulated in KD (that is,  $\text{average}(\text{rescue})/\text{average}(\text{control}) \geq 1.4$ ) [significant difference between rescue and KD + right fold change tendency for DE genes downregulated in KD] or

3.) p-value t-test rescue vs. Grhl2-KD  $< 0.05$  and  $\text{average}(\text{rescue})/\text{average}(\text{control}) \leq 1.4$  for differential genes upregulated in KD (that is,  $\text{average}(\text{rescue})/\text{average}(\text{control}) \leq 1/1.4$ ) [significant difference between rescue and KD + right fold change tendency for DE genes upregulated in KD].

### **ChIP data analysis**

The alignment was done using Bowtie2. The reads were then filtered by applying a mapping quality threshold ( $\text{MAPQ} > 20$ ), removing PCR duplicates, and considering only uniquely mapping reads with less than 1bp mismatch. We used MACS for peak calling with default parameters ( $P < 1e-05$ ). Foreground and background models used for peak finding are mentioned in the main paper as well as total peak numbers. The peaks were ranked according to the intrinsic scores provided by MACS (negative  $\log_{10}$  transform of the peak's p-value). Motif finding was then performed using MEME on the top 10% of all peaks in a 50 bp window around the peak's summit and optimized for de novo detection of 8-9 base pair motifs.<sup>5</sup> Motif enrichment in a given sequence set was done using MAST and FIMO.<sup>6,7</sup> Visualization of the ChIP data was carried out using the Integrative Genome Viewer provided by the Broad Institute.<sup>8,9</sup>

### **Miscellaneous Bioinformatics**

Most of the plots of the bioinformatics related figures were generated with custom-made python scripts using matplotlib.<sup>10</sup> Operations on genomic intervals (e.g. generation of random peaks,



distance calculations) were based on bedtools and its python interface pybedtools.<sup>11,12</sup> Analogously, operations on sam and bam files were performed with samtools and pysam,<sup>13</sup> respectively. Gene ontology and CHIP peak annotation was done using HOMER.<sup>14</sup>

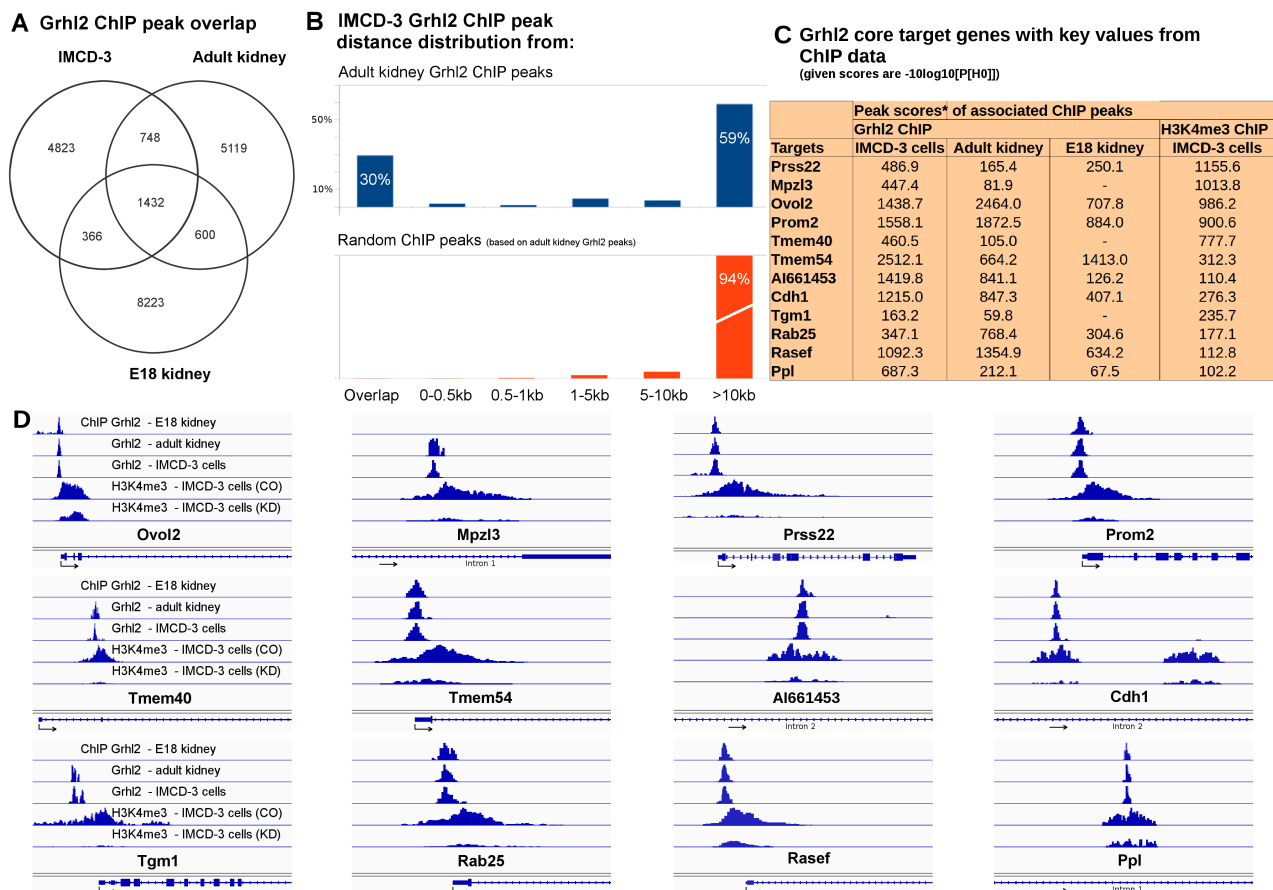

## Supplemental Figure 1

### Grh12 binding through ChIP-seq and derived target genes by combining ChIP-seq and gene expression data.

**A** Venn diagram for all Grh12 ChIP peaks shows a significant overlap between IMCD-3 cells, adult, and E18 kidney. **B** The Distance distribution of IMCD-3 Grh12 ChIP peaks from adult kidney Grh12 ChIP peaks reveal two distinct groups with peaks that either intersect or occur at larger distances (>10 kb) from each other. The bottom orange subplot shows the distance distribution from a random set of control peaks based on adult kidney Grh12 ChIP peaks. **C** Overview of the Grh12 target gene set with scores and key values from ChIP-seq experiments. The Grh12 peak score is referring to MACS generic peak score. In case of multiple peak occurrences, the scores refer to the most significant peaks fulfilling the criteria mentioned in the main text. **D** Grh12 target genes with ChIP tracks at the Grh12 and differential H3K4me3 peak areas which have been used for Grh12 target identification. Target genes were obtained based on differential expression in microarray data, differential H3K4 trimethylation, and Grh12 ChIP peak occurrence (with Grh12 binding motif) in IMCD-3 cells and adult kidney (differential H3K4me3 peak occurring  $\pm 500$ bp from TSS and/or within genomic region, Grh12 ChIP peaks intersecting each other and H3K4me3 peak area). Note that most of the targets also exhibit a ChIP peak in E18 kidney.

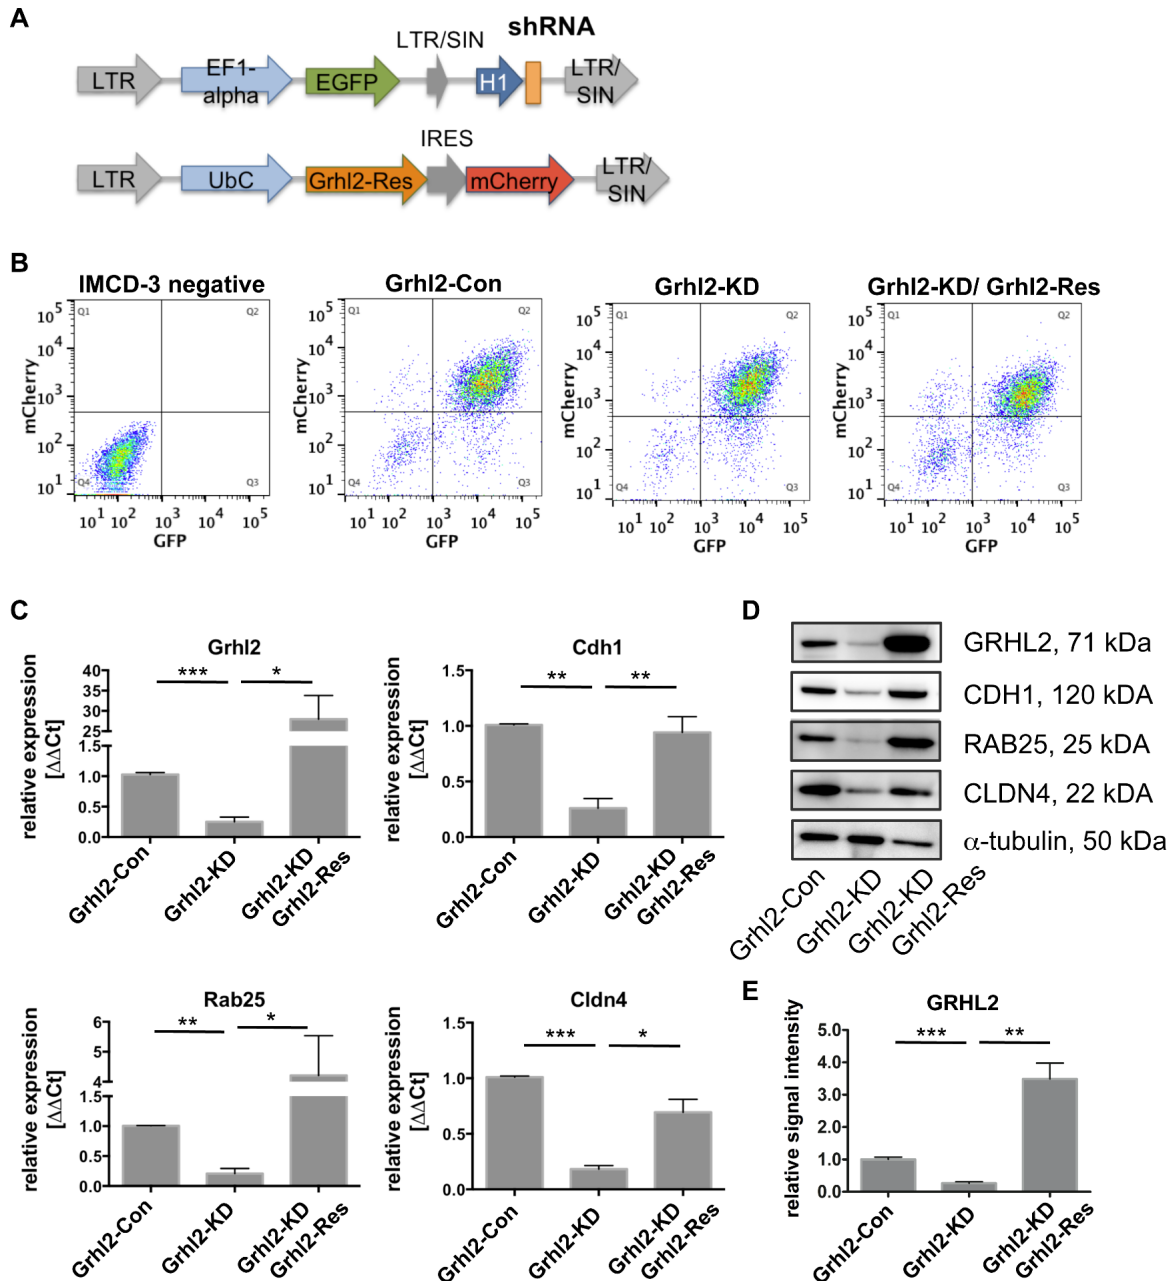

## Supplemental Figure 2

### Validation of IMCD-3 Grhl2-KD cells.

IMCD-3 cells were infected with lentiviral particles to stably integrate expression cassettes for a Grhl2 shRNA (or control shRNA) and the marker gene GFP **A**. Lentiviral particles were used in a multiplicity of infection (MOI) of 5. At the same time, cells were transduced to integrate a cassette for synthesis of a Grhl2 rescue (Grhl2-Res) construct (or control cDNA), followed by mCherry (MOI: 0.5). **B** At least six days after infection, GFP- and mCherry-expressing cells were isolated using Fluorescence-activated cell sorting (FACS; IMCD-3 negative: non-infected cells; Control (Grhl2-Con): control shRNA, GFP plus control cDNA and mCherry; Grhl2-KD: Grhl2 shRNA, GFP plus cDNA and mCherry; Grhl2-KD/Grhl2-Res: Grhl2 shRNA, GFP plus Grhl2-Res and mCherry).

Isolated cells were expanded and used for further investigations. Expression of Grhl2 and known targets Cdh1, Cldn4, and Rab25 was confirmed in IMCD-3 Grhl2-KD, control cells (Grhl2-Con), and Grhl2-KD;Grhl2-Res cells using quantitative RT-PCR **C** and Western blots **D**. **E** Shown is a quantification of GRHL2 expression from Western blots (mean  $\pm$  SD, \*\*\* $p$ <0.001, \*\* $p$ <0.01, \* $p$ <0.05).

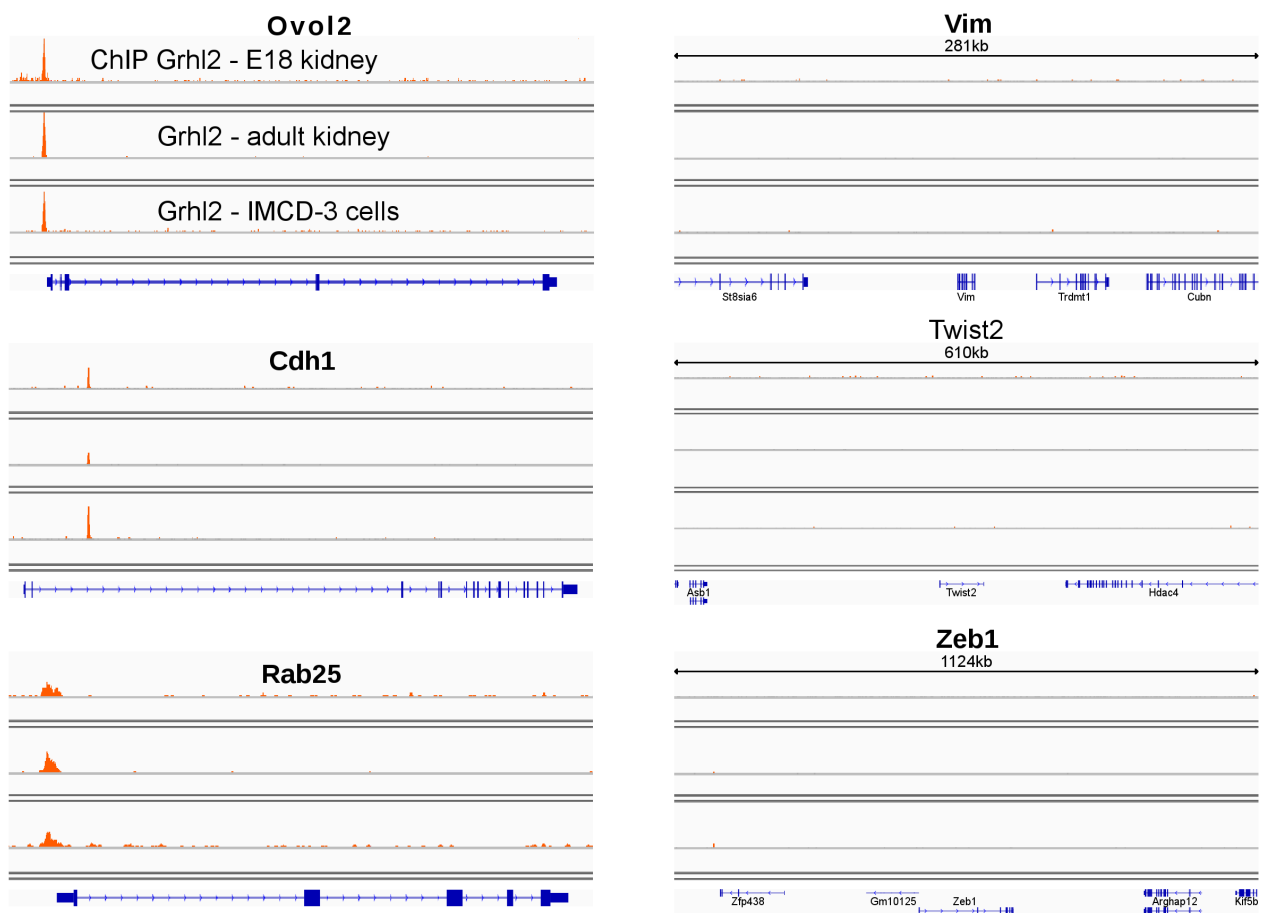

### Supplemental Figure 3

#### Grhl2 ChIP tracks at selected core targets and EMT genes.

IGV snapshots of raw read count tracks from Grhl2 ChIP-seq experiments for murine E18, adult kidney, and IMCD-3 cells. The plots on the left side show 3 genes of the Grhl2 core target module (Ovol2, Cdh1, Rab25). On the right, raw read count tracks for Vim, Twist2, and Zeb1 are displayed with read count signal at noise level even at long distance around the respective gene. All tracks are scaled to the peak height of the Ovol2 tracks.

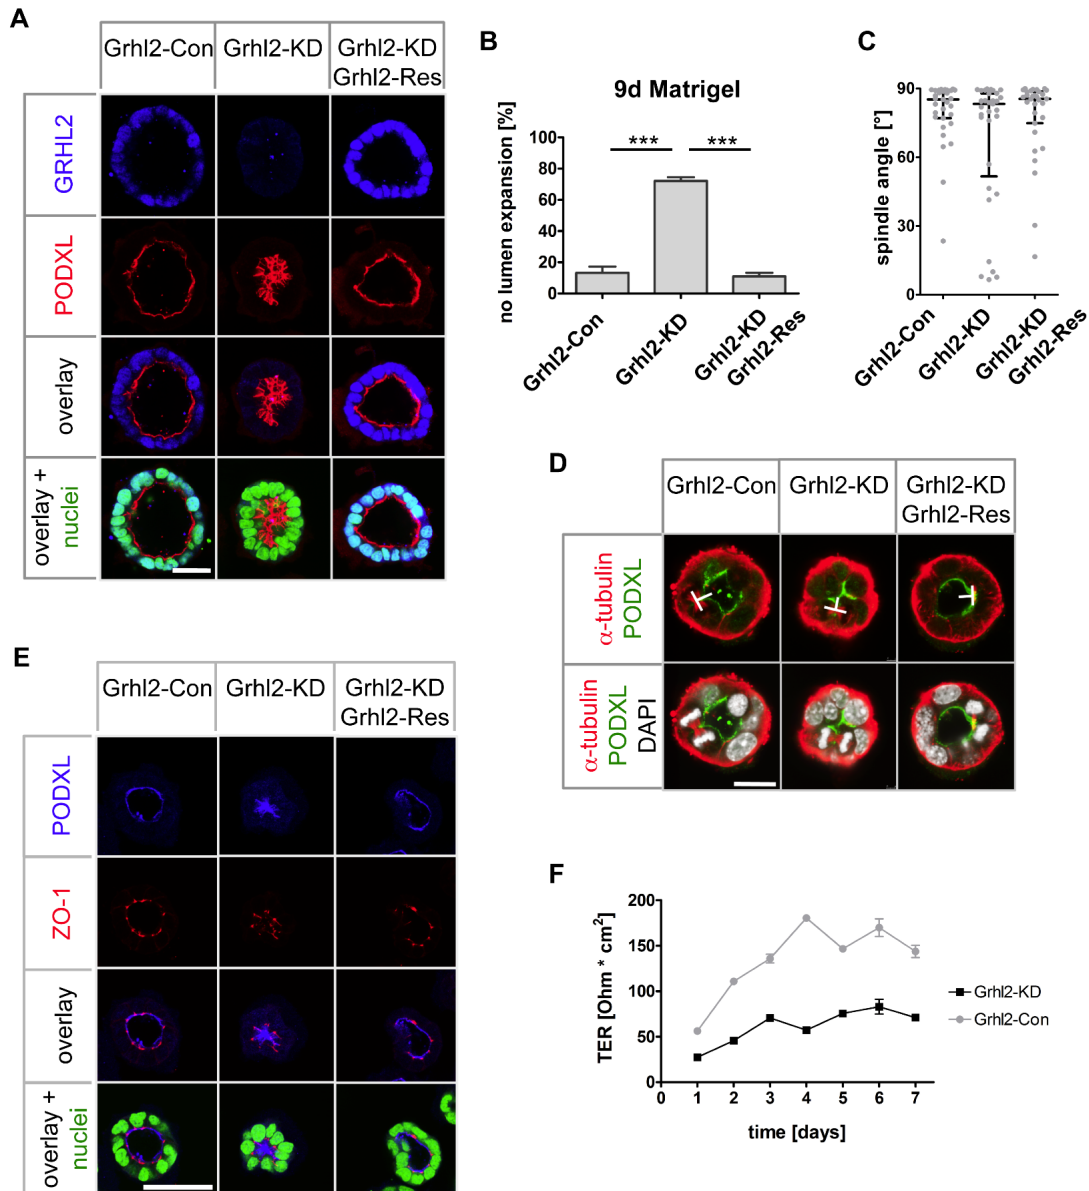

## Supplemental Figure 4

### Characterization of IMCD-3 Grhl2-KD cysts at several time points.

**A** Culture period of Grhl2-Con, Grhl2-KD, and Grhl2-KD;Grhl2-Res was prolonged to nine days in Matrigel. Cysts were immunofluorescence-stained with antibodies against GRHL2 and podocalyxin (PODXL). Nuclei were counterstained using SYTOXGreen; scale bar: 25  $\mu$ m. **B** Still most of Grhl2-KD cysts did not form open lumen cysts compared to Grhl2-Con and Grhl2-KD;Grhl2-Res (mean  $\pm$  SEM). **C, D** Grhl2-Con, Grhl2-KD, and Grhl2-KD; Grhl2-Res cells were grown in Matrigel for four days. Cells were immunofluorescence-stained using antibodies against  $\alpha$ -tubulin and PODXL. Nuclei were counterstained using DAPI. **C** Orientation of the mitotic spindle towards the lumen, for Grhl2-Con and Grhl2-KD-Res cysts, or the podocalyxin-marked center of the whole cyst, for Grhl2-KD cysts, were analyzed (median and IQR). **D** Representative mitotic spindles in Grhl2-Con, Grhl2-KD and Grhl2-KD, Grhl2-Res cysts are shown; scale bar: 15  $\mu$ m. **E** Grhl2-Con, Grhl2-KD,

and Grhl2-KD;Grhl2-Res cells were grown in Matrigel for five days and immunofluorescence-stained using antibodies against PODXL and tight junction protein zonula occludens-1 (ZO-1). Staining revealed no overt abnormalities in ZO-1 localization in Grhl2-KD cysts, compared to Grhl2-Con and Grhl2-KD;Grhl2-Res cysts; scale bar: 38  $\mu$ m. **F** Grhl2-Con and Grhl2-KD cells were grown on polycarbonate membranes. Measurements of transepithelial resistances (TER) are shown for seven days (mean  $\pm$  SEM).

**A**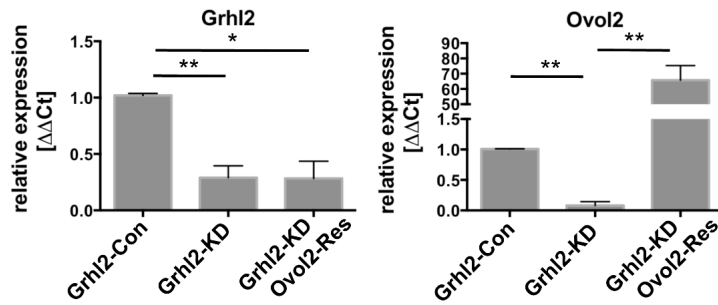**B**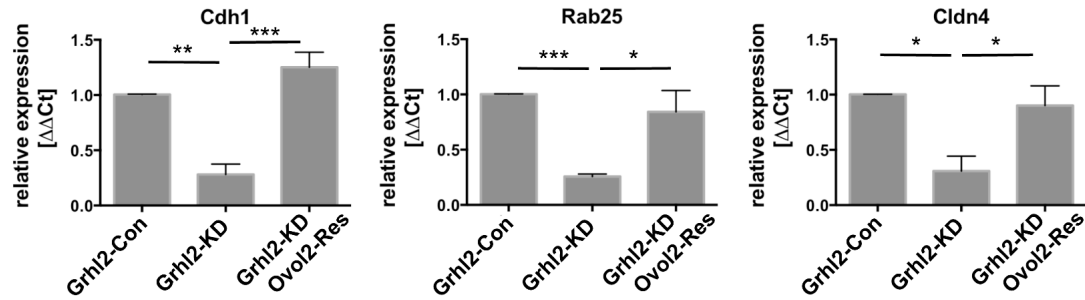**Supplemental Figure 5****Validation of IMCD-3 Grhl2-KD;Ovo12-Res cells.**

**A, B** IMCD-3 cells were infected with lentiviral particles to integrate expression cassettes for a Grhl2 shRNA, or control shRNA, and for the marker gene GFP. At the same time, cells were transduced to integrate a cassette for synthesis of full-length cDNA of Ovo12A (Grhl2-KD; Ovo12-Res), or Luciferase control gene, followed by mCherry. GFP- and mCherry-expressing cells were isolated using FACS. **A** Expression of Grhl2 and Ovo12 were confirmed in Grhl2-Con, Grhl2-KD, and Grhl2-KD;Ovo12 using quantitative RT-PCR. **B** Shown are expression data for Cdh1, Rab25, and Cldn4 in Grhl2-Con, Grhl2-KD, and Grhl2-KD;Ovo12-Res using quantitative RT-PCR (mean  $\pm$ SD, \*\*\* $p$ <0.001, \*\* $p$ <0.01, \* $p$ <0.05).



## Supplemental Table 1

### Differentially expressed genes between Grhl2-Con and Grhl2-KD.

List of differentially expressed genes with expression levels in Grhl2-Con, Grhl2-KD, and the rescue constructs for Grhl2 and Ovol2.

| Gene name (Illumina) | Averages  |          |           |           | Fold changes |                       |                       | ttest<br>Con vs.<br>KD | Rescue success in |               |
|----------------------|-----------|----------|-----------|-----------|--------------|-----------------------|-----------------------|------------------------|-------------------|---------------|
|                      | Grhl2-Con | Grhl2-KD | Grhl2-Res | Ovol2-Res | Con/KD       | Ovol2-<br>Res/<br>Con | Grhl2-<br>Res/<br>Con |                        | Grhl2-<br>Res     | Ovol2-<br>Res |
| Atp8b1               | 596.64    | 244.42   | 586.35    | 225.71    | 2.44         | 0.38                  | 0.98                  | 0.0001                 | 1                 | 0             |
| Calm3                | 9050.18   | 17566.95 | 17994.21  | 16783.07  | 0.52         | 1.85                  | 1.99                  | 0.0002                 | 0                 | 0             |
| 2310040B03Rik        | 562.49    | 898.48   | 540.07    | 712.44    | 0.63         | 1.27                  | 0.96                  | 0.0002                 | 1                 | 1             |
| Ovol2                | 258.80    | 179.12   | 302.73    | 385.12    | 1.44         | 1.49                  | 1.17                  | 0.0002                 | 1                 | 1             |
| Il28ra               | 845.52    | 588.41   | 1002.23   | 1101.72   | 1.44         | 1.30                  | 1.19                  | 0.0003                 | 1                 | 1             |
| Atg9b                | 4526.00   | 1231.47  | 4313.38   | 6713.05   | 3.68         | 1.48                  | 0.95                  | 0.0003                 | 1                 | 1             |
| LOC100046254         | 285.01    | 178.00   | 233.31    | 200.42    | 1.60         | 0.70                  | 0.82                  | 0.0004                 | 1                 | 0             |
| Ap1m2                | 1015.24   | 312.64   | 967.75    | 1595.49   | 3.25         | 1.57                  | 0.95                  | 0.0004                 | 1                 | 1             |
| Tmem54               | 3272.00   | 476.29   | 4298.71   | 487.02    | 6.87         | 0.15                  | 1.31                  | 0.0005                 | 1                 | 0             |
| EG432448             | 6816.56   | 13124.74 | 11778.28  | 11879.01  | 0.52         | 1.74                  | 1.73                  | 0.0005                 | 0                 | 0             |
| Prss8                | 1277.87   | 740.15   | 1045.18   | 1049.30   | 1.73         | 0.82                  | 0.82                  | 0.0005                 | 1                 | 1             |
| Meis2                | 2043.83   | 2910.19  | 1827.38   | 1967.63   | 0.70         | 0.96                  | 0.89                  | 0.0006                 | 1                 | 1             |
| Sprr1a               | 967.41    | 465.55   | 321.26    | 2090.60   | 2.08         | 2.16                  | 0.33                  | 0.0006                 | 0                 | 1             |
| Bhlhb2               | 4033.83   | 2365.93  | 4860.47   | 5796.33   | 1.70         | 1.44                  | 1.20                  | 0.0006                 | 1                 | 1             |
| Wisp2                | 159.86    | 241.61   | 238.43    | 155.26    | 0.66         | 0.97                  | 1.49                  | 0.0007                 | 1                 | 1             |
| LOC100046802         | 282.11    | 598.72   | 187.63    | 633.44    | 0.47         | 2.25                  | 0.67                  | 0.0008                 | 1                 | 0             |
| Eno3                 | 500.11    | 881.53   | 352.73    | 1201.21   | 0.57         | 2.40                  | 0.71                  | 0.0008                 | 1                 | 0             |
| Galnt3               | 232.26    | 158.01   | 224.47    | 290.53    | 1.47         | 1.25                  | 0.97                  | 0.0008                 | 1                 | 1             |
| LOC100046211         | 5101.68   | 8774.14  | 6738.59   | 8947.54   | 0.58         | 1.75                  | 1.32                  | 0.0010                 | 1                 | 0             |
| LOC214575            | 235.98    | 161.40   | 277.71    | 199.46    | 1.46         | 0.85                  | 1.18                  | 0.0010                 | 1                 | 1             |
| Slc44a2              | 3517.47   | 2498.94  | 2938.12   | 2293.49   | 1.41         | 0.65                  | 0.84                  | 0.0010                 | 1                 | 0             |
| Npal2                | 2019.51   | 769.11   | 1500.12   | 1417.14   | 2.63         | 0.70                  | 0.74                  | 0.0011                 | 1                 | 1             |
| LOC100047167         | 1249.91   | 2194.93  | 1482.30   | 2136.44   | 0.57         | 1.71                  | 1.19                  | 0.0012                 | 1                 | 0             |
| Dkk3                 | 822.68    | 1510.65  | 706.57    | 665.69    | 0.54         | 0.81                  | 0.86                  | 0.0012                 | 1                 | 1             |
| Oclr                 | 1017.34   | 687.22   | 937.51    | 748.83    | 1.48         | 0.74                  | 0.92                  | 0.0012                 | 1                 | 0             |
| Marveld1             | 427.63    | 754.20   | 359.14    | 273.95    | 0.57         | 0.64                  | 0.84                  | 0.0012                 | 1                 | 1             |
| Sc4mol               | 11040.51  | 7306.50  | 7110.08   | 6910.16   | 1.51         | 0.63                  | 0.64                  | 0.0013                 | 1                 | 0             |
| Pi4k2b               | 1904.97   | 2769.45  | 1798.75   | 2185.47   | 0.69         | 1.15                  | 0.94                  | 0.0013                 | 1                 | 1             |
| Ccdc68               | 700.59    | 281.21   | 338.72    | 508.67    | 2.49         | 0.73                  | 0.48                  | 0.0013                 | 0                 | 1             |
| Syt8                 | 426.54    | 184.71   | 214.19    | 242.04    | 2.31         | 0.57                  | 0.50                  | 0.0013                 | 0                 | 0             |
| Gpbar1               | 190.71    | 559.89   | 168.89    | 322.36    | 0.34         | 1.69                  | 0.89                  | 0.0014                 | 1                 | 0             |
| 9930039L23Rik        | 4195.62   | 2144.35  | 3092.12   | 2745.79   | 1.96         | 0.65                  | 0.74                  | 0.0014                 | 1                 | 0             |
| Mal                  | 4346.98   | 1448.58  | 3173.67   | 3903.48   | 3.00         | 0.90                  | 0.73                  | 0.0015                 | 1                 | 1             |
| Otud7b               | 570.81    | 398.92   | 504.76    | 510.43    | 1.43         | 0.89                  | 0.88                  | 0.0016                 | 1                 | 1             |
| Epha1                | 548.09    | 261.79   | 701.32    | 488.67    | 2.09         | 0.89                  | 1.28                  | 0.0016                 | 1                 | 1             |
| Stard10              | 2780.30   | 1382.27  | 3934.59   | 1372.92   | 2.01         | 0.49                  | 1.42                  | 0.0016                 | 1                 | 0             |
| Inadl                | 404.91    | 279.45   | 453.05    | 410.20    | 1.45         | 1.01                  | 1.12                  | 0.0017                 | 1                 | 1             |
| Ptpla                | 394.19    | 653.10   | 322.44    | 318.36    | 0.60         | 0.81                  | 0.82                  | 0.0017                 | 1                 | 1             |
| Il17re               | 573.30    | 182.59   | 1346.34   | 151.87    | 3.14         | 0.26                  | 2.35                  | 0.0018                 | 1                 | 0             |
| B3gnt3               | 567.92    | 331.33   | 444.73    | 635.51    | 1.71         | 1.12                  | 0.78                  | 0.0018                 | 1                 | 1             |
| Phldb1               | 555.14    | 833.17   | 443.43    | 547.29    | 0.67         | 0.99                  | 0.80                  | 0.0019                 | 1                 | 1             |
| Pcyt1b               | 1023.66   | 651.25   | 725.16    | 891.54    | 1.57         | 0.87                  | 0.71                  | 0.0021                 | 0                 | 1             |
| Eps8l1               | 289.24    | 190.36   | 361.10    | 399.94    | 1.52         | 1.38                  | 1.25                  | 0.0022                 | 1                 | 1             |

| Gene name (Illumina) | Averages  |          |           |           | Fold changes |                       |                       | ttest<br>Con vs.<br>KD | Rescue success in |               |
|----------------------|-----------|----------|-----------|-----------|--------------|-----------------------|-----------------------|------------------------|-------------------|---------------|
|                      | Grhl2-Con | Grhl2-KD | Grhl2-Res | Ovol2-Res | Con/KD       | Ovol2-<br>Res/<br>Con | Grhl2-<br>Res/<br>Con |                        | Grhl2-<br>Res     | Ovol2-<br>Res |
| Rasef                | 230.72    | 157.31   | 292.30    | 158.48    | 1.47         | 0.69                  | 1.27                  | 0.0023                 | 1                 | 0             |
| Usp43                | 404.42    | 271.88   | 443.56    | 440.57    | 1.49         | 1.09                  | 1.10                  | 0.0023                 | 1                 | 1             |
| Cpe                  | 9908.38   | 16885.12 | 6390.62   | 5632.92   | 0.59         | 0.57                  | 0.64                  | 0.0023                 | 1                 | 1             |
| Zscan21              | 1264.11   | 1781.93  | 417.25    | 841.92    | 0.71         | 0.67                  | 0.33                  | 0.0023                 | 1                 | 1             |
| 2010004A03Rik        | 788.32    | 541.24   | 466.08    | 876.73    | 1.46         | 1.11                  | 0.59                  | 0.0024                 | 1                 | 1             |
| Pkia                 | 3440.06   | 5614.56  | 3303.00   | 3032.40   | 0.61         | 0.88                  | 0.96                  | 0.0025                 | 1                 | 1             |
| Thbs3                | 286.07    | 427.83   | 435.12    | 377.53    | 0.67         | 1.32                  | 1.52                  | 0.0025                 | 1                 | 1             |
| Myo9a                | 419.37    | 632.50   | 432.58    | 312.26    | 0.66         | 0.74                  | 1.03                  | 0.0025                 | 1                 | 1             |
| sc10003547.1_6       | 339.60    | 561.07   | 298.56    | 283.26    | 0.61         | 0.83                  | 0.88                  | 0.0026                 | 1                 | 1             |
| Rrad                 | 653.75    | 974.58   | 460.03    | 985.36    | 0.67         | 1.51                  | 0.70                  | 0.0026                 | 1                 | 1             |
| Cdh6                 | 3737.95   | 6336.54  | 4940.14   | 3722.85   | 0.59         | 1.00                  | 1.32                  | 0.0027                 | 1                 | 1             |
| Cldn4                | 27144.28  | 9168.79  | 27597.50  | 30441.99  | 2.96         | 1.12                  | 1.02                  | 0.0028                 | 1                 | 1             |
| AI427122             | 1160.55   | 571.63   | 780.03    | 1134.80   | 2.03         | 0.98                  | 0.67                  | 0.0029                 | 0                 | 1             |
| Batf3                | 182.82    | 268.33   | 205.33    | 206.49    | 0.68         | 1.13                  | 1.12                  | 0.0029                 | 1                 | 1             |
| Cxcl16               | 2034.03   | 726.45   | 2609.12   | 2240.99   | 2.80         | 1.10                  | 1.28                  | 0.0029                 | 1                 | 1             |
| Anapc5               | 9000.87   | 13215.64 | 10385.50  | 13060.71  | 0.68         | 1.45                  | 1.15                  | 0.0031                 | 1                 | 0             |
| Marveld3             | 1183.92   | 622.90   | 1119.24   | 883.91    | 1.90         | 0.75                  | 0.95                  | 0.0031                 | 1                 | 1             |
| Mobk1b               | 1656.47   | 1092.48  | 1308.97   | 1024.31   | 1.52         | 0.62                  | 0.79                  | 0.0032                 | 0                 | 0             |
| Zeb1                 | 343.33    | 1340.83  | 214.35    | 294.80    | 0.26         | 0.86                  | 0.62                  | 0.0032                 | 1                 | 1             |
| Tnk1                 | 1930.21   | 1052.81  | 2571.52   | 2947.82   | 1.83         | 1.53                  | 1.33                  | 0.0033                 | 1                 | 1             |
| Tspan18              | 230.51    | 409.81   | 150.32    | 429.74    | 0.56         | 1.86                  | 0.65                  | 0.0034                 | 1                 | 0             |
| Itgb4                | 4544.50   | 2472.02  | 5434.25   | 7267.41   | 1.84         | 1.60                  | 1.20                  | 0.0034                 | 1                 | 1             |
| 3110043J09Rik        | 548.60    | 373.42   | 521.41    | 486.33    | 1.47         | 0.89                  | 0.95                  | 0.0035                 | 1                 | 1             |
| Hnt                  | 496.51    | 710.05   | 332.28    | 280.48    | 0.70         | 0.56                  | 0.67                  | 0.0036                 | 1                 | 1             |
| Cdh1                 | 1354.63   | 515.19   | 1190.31   | 1637.61   | 2.63         | 1.21                  | 0.88                  | 0.0037                 | 1                 | 1             |
| Stx2                 | 395.34    | 627.37   | 319.75    | 379.97    | 0.63         | 0.96                  | 0.81                  | 0.0037                 | 1                 | 1             |
| Sult2b1              | 537.83    | 374.16   | 1112.66   | 987.47    | 1.44         | 1.84                  | 2.07                  | 0.0038                 | 1                 | 1             |
| Mvd                  | 2754.42   | 1802.94  | 2016.96   | 1817.13   | 1.53         | 0.66                  | 0.73                  | 0.0038                 | 0                 | 0             |
| Mapk13               | 2036.04   | 1033.38  | 4640.18   | 2696.44   | 1.97         | 1.32                  | 2.28                  | 0.0041                 | 1                 | 1             |
| 1700012H17Rik        | 1361.16   | 843.95   | 1287.04   | 558.86    | 1.61         | 0.41                  | 0.95                  | 0.0041                 | 1                 | 0             |
| St8sia2              | 196.98    | 286.13   | 167.21    | 135.57    | 0.69         | 0.69                  | 0.85                  | 0.0042                 | 1                 | 1             |
| Mtap7                | 1064.54   | 566.15   | 1133.79   | 1423.52   | 1.88         | 1.34                  | 1.07                  | 0.0042                 | 1                 | 1             |
| A430088H15Rik        | 2610.05   | 1541.27  | 1939.54   | 1679.72   | 1.69         | 0.64                  | 0.74                  | 0.0043                 | 1                 | 1             |
| Flrt3                | 552.09    | 293.56   | 316.37    | 297.44    | 1.88         | 0.54                  | 0.57                  | 0.0044                 | 0                 | 0             |
| Cldn23               | 551.40    | 267.41   | 1387.03   | 636.26    | 2.06         | 1.15                  | 2.52                  | 0.0044                 | 1                 | 1             |
| Bahcc1               | 1408.25   | 2068.36  | 1792.27   | 2184.47   | 0.68         | 1.55                  | 1.27                  | 0.0045                 | 1                 | 0             |
| Kif21a               | 459.52    | 319.74   | 443.89    | 305.92    | 1.44         | 0.67                  | 0.97                  | 0.0045                 | 1                 | 0             |
| Ehd2                 | 193.09    | 274.07   | 149.48    | 238.41    | 0.70         | 1.23                  | 0.77                  | 0.0045                 | 1                 | 1             |
| LOC100048721         | 398.12    | 229.50   | 232.32    | 227.36    | 1.73         | 0.57                  | 0.58                  | 0.0046                 | 0                 | 0             |
| Slco4a1              | 2139.00   | 1461.05  | 1856.76   | 1973.61   | 1.46         | 0.92                  | 0.87                  | 0.0046                 | 1                 | 1             |
| Gmfg                 | 304.87    | 206.58   | 317.38    | 372.32    | 1.48         | 1.22                  | 1.04                  | 0.0049                 | 1                 | 1             |
| Smox                 | 1897.36   | 1073.07  | 2302.64   | 2528.74   | 1.77         | 1.33                  | 1.21                  | 0.0050                 | 1                 | 1             |
| Gper                 | 320.34    | 978.00   | 259.84    | 535.30    | 0.33         | 1.67                  | 0.81                  | 0.0050                 | 1                 | 1             |
| Nfix                 | 666.31    | 1482.63  | 836.19    | 1023.91   | 0.45         | 1.54                  | 1.25                  | 0.0051                 | 1                 | 1             |
| Fut10                | 738.94    | 1101.89  | 687.15    | 398.69    | 0.67         | 0.54                  | 0.93                  | 0.0052                 | 1                 | 1             |
| Foxc1                | 3368.75   | 5012.78  | 3653.60   | 3048.94   | 0.67         | 0.91                  | 1.08                  | 0.0053                 | 1                 | 1             |
| St14                 | 1679.98   | 712.99   | 1789.77   | 1754.53   | 2.36         | 1.04                  | 1.07                  | 0.0054                 | 1                 | 1             |

| Gene name (Illumina) | Averages  |          |           |           | Fold changes |                       |                       | ttest<br>Con vs.<br>KD | Rescue success in |               |
|----------------------|-----------|----------|-----------|-----------|--------------|-----------------------|-----------------------|------------------------|-------------------|---------------|
|                      | Grhl2-Con | Grhl2-KD | Grhl2-Res | Ovol2-Res | Con/KD       | Ovol2-<br>Res/<br>Con | Grhl2-<br>Res/<br>Con |                        | Grhl2-<br>Res     | Ovol2-<br>Res |
| LOC100040736         | 146.62    | 208.25   | 153.93    | 175.37    | 0.70         | 1.20                  | 1.05                  | 0.0054                 | 1                 | 1             |
| Gsto1                | 23254.76  | 9391.20  | 15580.07  | 23633.54  | 2.48         | 1.02                  | 0.67                  | 0.0054                 | 0                 | 1             |
| 6430573F11Rik        | 513.11    | 823.49   | 533.84    | 328.08    | 0.62         | 0.64                  | 1.04                  | 0.0055                 | 1                 | 1             |
| Nr2c1                | 503.45    | 345.85   | 365.95    | 359.45    | 1.46         | 0.71                  | 0.73                  | 0.0055                 | 0                 | 0             |
| Pkd2                 | 2167.22   | 3271.71  | 1470.09   | 1973.43   | 0.66         | 0.91                  | 0.68                  | 0.0057                 | 1                 | 1             |
| Aacs                 | 4020.60   | 5630.80  | 5926.12   | 4751.25   | 0.71         | 1.18                  | 1.47                  | 0.0058                 | 0                 | 1             |
| Fmnl2                | 1452.34   | 2105.23  | 601.31    | 851.44    | 0.69         | 0.59                  | 0.41                  | 0.0058                 | 1                 | 1             |
| H2-K1                | 556.98    | 395.41   | 706.21    | 706.44    | 1.41         | 1.27                  | 1.27                  | 0.0061                 | 1                 | 1             |
| Car12                | 711.76    | 1329.96  | 614.44    | 478.84    | 0.54         | 0.67                  | 0.86                  | 0.0061                 | 1                 | 1             |
| Ank                  | 1219.68   | 2825.28  | 1186.97   | 1671.80   | 0.43         | 1.37                  | 0.97                  | 0.0062                 | 1                 | 1             |
| Slc4a11              | 385.33    | 220.53   | 334.08    | 511.03    | 1.75         | 1.33                  | 0.87                  | 0.0063                 | 1                 | 1             |
| Fam110b              | 1138.50   | 696.90   | 1043.03   | 483.96    | 1.63         | 0.43                  | 0.92                  | 0.0064                 | 1                 | 0             |
| LOC100044622         | 369.56    | 521.14   | 400.15    | 251.52    | 0.71         | 0.68                  | 1.08                  | 0.0065                 | 1                 | 1             |
| Trp53i11             | 330.84    | 575.72   | 349.01    | 647.42    | 0.57         | 1.96                  | 1.05                  | 0.0065                 | 1                 | 0             |
| 9530095P18Rik        | 808.27    | 425.90   | 632.19    | 607.53    | 1.90         | 0.75                  | 0.78                  | 0.0066                 | 1                 | 1             |
| Ctla2b               | 191.41    | 131.61   | 128.54    | 167.32    | 1.45         | 0.87                  | 0.67                  | 0.0067                 | 0                 | 1             |
| BC046418             | 477.99    | 322.42   | 436.77    | 497.65    | 1.48         | 1.04                  | 0.91                  | 0.0067                 | 1                 | 1             |
| Ankrd56              | 2807.70   | 1906.27  | 3351.17   | 3022.00   | 1.47         | 1.08                  | 1.19                  | 0.0072                 | 1                 | 1             |
| Slc29a1              | 648.06    | 1007.04  | 752.45    | 955.72    | 0.64         | 1.47                  | 1.16                  | 0.0076                 | 1                 | 1             |
| Ppp1r14d             | 221.13    | 156.74   | 211.63    | 208.43    | 1.41         | 0.94                  | 0.96                  | 0.0078                 | 1                 | 1             |
| A730040I05Rik        | 365.09    | 235.57   | 258.29    | 395.57    | 1.55         | 1.08                  | 0.71                  | 0.0079                 | 0                 | 1             |
| Dclk2                | 387.38    | 684.60   | 305.44    | 268.99    | 0.57         | 0.69                  | 0.79                  | 0.0079                 | 1                 | 1             |
| 4732474O15Rik        | 1166.75   | 418.94   | 1025.16   | 714.23    | 2.78         | 0.61                  | 0.88                  | 0.0084                 | 1                 | 0             |
| Rpl18a               | 13054.97  | 8693.33  | 14155.53  | 12170.41  | 1.50         | 0.93                  | 1.08                  | 0.0084                 | 1                 | 1             |
| 1700047I17Rik1       | 1711.35   | 1207.20  | 2179.28   | 1599.96   | 1.42         | 0.93                  | 1.27                  | 0.0084                 | 1                 | 1             |
| 9530027K23Rik        | 1776.84   | 904.25   | 1916.29   | 1161.14   | 1.96         | 0.65                  | 1.08                  | 0.0085                 | 1                 | 0             |
| Anxa1                | 1946.66   | 882.37   | 1418.48   | 1185.35   | 2.21         | 0.61                  | 0.73                  | 0.0085                 | 1                 | 0             |
| Rgl1                 | 449.09    | 668.07   | 405.17    | 538.99    | 0.67         | 1.20                  | 0.90                  | 0.0085                 | 1                 | 1             |
| Cldn7                | 1280.72   | 650.90   | 1346.79   | 1819.74   | 1.97         | 1.42                  | 1.05                  | 0.0086                 | 1                 | 1             |
| Krt7                 | 14541.59  | 5269.03  | 8977.73   | 16283.77  | 2.76         | 1.12                  | 0.62                  | 0.0086                 | 0                 | 1             |
| Kntc1                | 2772.97   | 3923.74  | 3305.99   | 3712.30   | 0.71         | 1.34                  | 1.19                  | 0.0087                 | 1                 | 0             |
| OTTMUSG00000015762   | 338.80    | 206.41   | 248.83    | 380.40    | 1.64         | 1.12                  | 0.73                  | 0.0087                 | 1                 | 1             |
| Stat1                | 663.54    | 456.30   | 747.46    | 438.98    | 1.45         | 0.66                  | 1.13                  | 0.0088                 | 1                 | 0             |
| Bspry                | 810.78    | 347.77   | 965.53    | 748.49    | 2.33         | 0.92                  | 1.19                  | 0.0088                 | 1                 | 1             |
| Mpp2                 | 194.65    | 288.46   | 143.48    | 159.89    | 0.67         | 0.82                  | 0.74                  | 0.0090                 | 1                 | 1             |
| Rcan1                | 422.62    | 911.91   | 656.28    | 268.80    | 0.46         | 0.64                  | 1.55                  | 0.0091                 | 1                 | 1             |
| lldr1                | 285.38    | 183.43   | 276.33    | 292.12    | 1.56         | 1.02                  | 0.97                  | 0.0091                 | 1                 | 1             |
| Rbm35a               | 7197.20   | 3190.41  | 7469.76   | 7954.26   | 2.26         | 1.11                  | 1.04                  | 0.0092                 | 1                 | 1             |
| Nt5dc2               | 3876.46   | 7943.51  | 4585.02   | 4998.34   | 0.49         | 1.29                  | 1.18                  | 0.0095                 | 1                 | 1             |
| Mpzl3                | 240.11    | 132.83   | 227.65    | 162.42    | 1.81         | 0.68                  | 0.95                  | 0.0097                 | 1                 | 0             |
| Hr                   | 512.99    | 758.04   | 2686.92   | 1915.88   | 0.68         | 3.73                  | 5.24                  | 0.0098                 | 0                 | 0             |
| Sgpp2                | 498.43    | 312.60   | 203.98    | 739.11    | 1.59         | 1.48                  | 0.41                  | 0.0098                 | 0                 | 1             |
| 3110050N22Rik        | 2042.55   | 2869.51  | 1541.58   | 1838.36   | 0.71         | 0.90                  | 0.75                  | 0.0101                 | 1                 | 1             |
| Cgn                  | 860.91    | 451.12   | 633.11    | 852.97    | 1.91         | 0.99                  | 0.74                  | 0.0101                 | 1                 | 1             |
| Sox12                | 954.35    | 1431.35  | 902.58    | 641.14    | 0.67         | 0.67                  | 0.95                  | 0.0103                 | 1                 | 1             |
| Fam110c              | 1154.08   | 644.89   | 1020.14   | 1059.51   | 1.79         | 0.92                  | 0.88                  | 0.0105                 | 1                 | 1             |
| Casp7                | 1181.16   | 1725.75  | 1154.15   | 1152.15   | 0.68         | 0.98                  | 0.98                  | 0.0106                 | 1                 | 1             |

| Gene name (Illumina) | Averages  |          |           |           | Fold changes |                       |                       | ttest<br>Con vs.<br>KD | Rescue success in |               |
|----------------------|-----------|----------|-----------|-----------|--------------|-----------------------|-----------------------|------------------------|-------------------|---------------|
|                      | Grhl2-Con | Grhl2-KD | Grhl2-Res | Ovol2-Res | Con/KD       | Ovol2-<br>Res/<br>Con | Grhl2-<br>Res/<br>Con |                        | Grhl2-<br>Res     | Ovol2-<br>Res |
| Krt19                | 6846.32   | 3086.42  | 5865.22   | 10099.60  | 2.22         | 1.48                  | 0.86                  | 0.0108                 | 1                 | 1             |
| Lpin3                | 448.39    | 309.85   | 437.76    | 392.53    | 1.45         | 0.88                  | 0.98                  | 0.0108                 | 1                 | 1             |
| Cda                  | 511.55    | 301.82   | 408.36    | 449.99    | 1.69         | 0.88                  | 0.80                  | 0.0109                 | 1                 | 1             |
| EG635702             | 234.96    | 162.65   | 224.52    | 138.87    | 1.44         | 0.59                  | 0.96                  | 0.0110                 | 1                 | 0             |
| Rab25                | 7624.17   | 1739.95  | 14198.88  | 6976.77   | 4.38         | 0.92                  | 1.86                  | 0.0110                 | 1                 | 1             |
| Mcam                 | 708.62    | 1157.16  | 388.85    | 558.35    | 0.61         | 0.79                  | 0.55                  | 0.0111                 | 1                 | 1             |
| D17H6S56E-5          | 804.21    | 515.90   | 825.44    | 669.46    | 1.56         | 0.83                  | 1.03                  | 0.0112                 | 1                 | 1             |
| Ppbbp                | 7756.87   | 3373.04  | 7125.99   | 5290.39   | 2.30         | 0.68                  | 0.92                  | 0.0113                 | 1                 | 1             |
| Wnt2                 | 169.82    | 389.45   | 151.43    | 165.07    | 0.44         | 0.97                  | 0.89                  | 0.0113                 | 1                 | 1             |
| 9830001H06Rik        | 540.76    | 971.76   | 238.45    | 423.77    | 0.56         | 0.78                  | 0.44                  | 0.0113                 | 1                 | 1             |
| Chrb1                | 5625.06   | 3532.76  | 5389.02   | 3639.63   | 1.59         | 0.65                  | 0.96                  | 0.0114                 | 1                 | 0             |
| Atp2a1               | 268.07    | 182.51   | 234.33    | 527.22    | 1.47         | 1.97                  | 0.87                  | 0.0114                 | 1                 | 1             |
| Arg1                 | 235.66    | 162.07   | 767.98    | 171.08    | 1.45         | 0.73                  | 3.26                  | 0.0114                 | 1                 | 0             |
| Gfm1                 | 1728.48   | 1182.99  | 1379.82   | 1500.81   | 1.46         | 0.87                  | 0.80                  | 0.0115                 | 0                 | 1             |
| Fbxo30               | 336.85    | 527.56   | 359.06    | 445.24    | 0.64         | 1.32                  | 1.07                  | 0.0115                 | 1                 | 0             |
| Efemp2               | 3484.96   | 5485.39  | 3243.45   | 4073.13   | 0.64         | 1.17                  | 0.93                  | 0.0115                 | 1                 | 1             |
| Stxbp1               | 727.98    | 1148.20  | 1693.08   | 428.65    | 0.63         | 0.59                  | 2.33                  | 0.0116                 | 0                 | 1             |
| Wipf1                | 380.24    | 753.46   | 203.73    | 465.26    | 0.50         | 1.22                  | 0.54                  | 0.0119                 | 1                 | 1             |
| Sfn                  | 813.02    | 393.14   | 1137.71   | 1019.45   | 2.07         | 1.25                  | 1.40                  | 0.0120                 | 1                 | 1             |
| Ttyh3                | 1754.95   | 3178.24  | 1127.70   | 1872.42   | 0.55         | 1.07                  | 0.64                  | 0.0120                 | 1                 | 1             |
| AW548124             | 265.15    | 547.77   | 174.41    | 253.84    | 0.48         | 0.96                  | 0.66                  | 0.0120                 | 1                 | 1             |
| 8430415N23Rik        | 580.44    | 1332.95  | 1519.38   | 1083.15   | 0.44         | 1.87                  | 2.62                  | 0.0120                 | 0                 | 0             |
| Maml1                | 330.28    | 499.07   | 376.26    | 404.97    | 0.66         | 1.23                  | 1.14                  | 0.0120                 | 1                 | 1             |
| Tmem38b              | 2175.49   | 1541.80  | 1882.36   | 1559.23   | 1.41         | 0.72                  | 0.87                  | 0.0122                 | 1                 | 0             |
| Msln                 | 1046.06   | 423.53   | 742.98    | 1024.77   | 2.47         | 0.98                  | 0.71                  | 0.0125                 | 1                 | 1             |
| 6330578E17Rik        | 1597.45   | 2507.57  | 2687.42   | 2851.25   | 0.64         | 1.78                  | 1.68                  | 0.0125                 | 0                 | 0             |
| sc10002694.1_23      | 350.25    | 204.18   | 323.37    | 357.34    | 1.72         | 1.02                  | 0.92                  | 0.0129                 | 1                 | 1             |
| 6330549D23Rik        | 289.87    | 500.96   | 197.67    | 209.36    | 0.58         | 0.72                  | 0.68                  | 0.0131                 | 1                 | 1             |
| LOC383576            | 921.37    | 537.53   | 1002.49   | 649.04    | 1.71         | 0.70                  | 1.09                  | 0.0131                 | 1                 | 0             |
| 9930023K05Rik        | 923.04    | 231.48   | 541.46    | 1925.81   | 3.99         | 2.09                  | 0.59                  | 0.0131                 | 0                 | 1             |
| Ccng1                | 2870.86   | 2042.54  | 3480.84   | 2699.94   | 1.41         | 0.94                  | 1.21                  | 0.0133                 | 1                 | 1             |
| Ly6a                 | 5516.55   | 1838.57  | 1687.62   | 8257.38   | 3.00         | 1.50                  | 0.31                  | 0.0133                 | 0                 | 1             |
| 4632417N05Rik        | 597.03    | 345.33   | 1171.98   | 263.19    | 1.73         | 0.44                  | 1.96                  | 0.0133                 | 1                 | 0             |
| Klk8                 | 1087.94   | 322.95   | 1047.39   | 2647.99   | 3.37         | 2.43                  | 0.96                  | 0.0134                 | 1                 | 1             |
| Nacc2                | 1498.18   | 3546.54  | 855.73    | 2078.40   | 0.42         | 1.39                  | 0.57                  | 0.0135                 | 1                 | 1             |
| Krt18                | 15048.22  | 7231.22  | 17235.49  | 16752.19  | 2.08         | 1.11                  | 1.15                  | 0.0138                 | 1                 | 1             |
| Twist2               | 1714.36   | 4515.89  | 820.99    | 1473.57   | 0.38         | 0.86                  | 0.48                  | 0.0139                 | 1                 | 1             |
| Tmem184a             | 1355.37   | 702.33   | 1841.21   | 1586.71   | 1.93         | 1.17                  | 1.36                  | 0.0140                 | 1                 | 1             |
| Krt20                | 906.16    | 327.08   | 476.00    | 2518.75   | 2.77         | 2.78                  | 0.53                  | 0.0140                 | 1                 | 1             |
| Fzd2                 | 1084.02   | 1611.16  | 822.57    | 1030.47   | 0.67         | 0.95                  | 0.76                  | 0.0140                 | 1                 | 1             |
| C920027118Rik        | 1168.08   | 719.22   | 619.90    | 909.99    | 1.62         | 0.78                  | 0.53                  | 0.0141                 | 0                 | 0             |
| Ube2e3               | 1320.44   | 1902.96  | 1114.20   | 1320.47   | 0.69         | 1.00                  | 0.84                  | 0.0141                 | 1                 | 1             |
| Agl                  | 596.58    | 888.50   | 715.98    | 544.11    | 0.67         | 0.91                  | 1.20                  | 0.0142                 | 1                 | 1             |
| D11Bwg0414e          | 9131.16   | 13346.19 | 10854.49  | 9371.49   | 0.68         | 1.03                  | 1.19                  | 0.0144                 | 1                 | 1             |
| Ctsh                 | 1675.07   | 701.31   | 1487.47   | 1663.13   | 2.39         | 0.99                  | 0.89                  | 0.0146                 | 1                 | 1             |
| Prkch                | 283.95    | 166.85   | 359.85    | 242.22    | 1.70         | 0.85                  | 1.27                  | 0.0147                 | 1                 | 1             |
| Cep170               | 1586.57   | 2301.57  | 834.72    | 932.67    | 0.69         | 0.59                  | 0.53                  | 0.0148                 | 1                 | 1             |

| Gene name (Illumina) | Averages  |          |           |           | Fold changes |                       |                       | ttest<br>Con vs.<br>KD | Rescue success in |               |
|----------------------|-----------|----------|-----------|-----------|--------------|-----------------------|-----------------------|------------------------|-------------------|---------------|
|                      | Grhl2-Con | Grhl2-KD | Grhl2-Res | Ovol2-Res | Con/KD       | Ovol2-<br>Res/<br>Con | Grhl2-<br>Res/<br>Con |                        | Grhl2-<br>Res     | Ovol2-<br>Res |
| 2310007B03Rik        | 1966.73   | 307.45   | 1724.94   | 2361.37   | 6.40         | 1.20                  | 0.88                  | 0.0148                 | 1                 | 1             |
| Tgfb1                | 811.67    | 1482.95  | 1172.55   | 844.37    | 0.55         | 1.04                  | 1.44                  | 0.0151                 | 1                 | 1             |
| Tmem40               | 826.55    | 228.12   | 1022.14   | 353.44    | 3.62         | 0.43                  | 1.24                  | 0.0152                 | 1                 | 0             |
| LOC100045981         | 2143.92   | 3407.51  | 3123.91   | 4094.27   | 0.63         | 1.91                  | 1.46                  | 0.0155                 | 1                 | 0             |
| Centd1               | 1181.36   | 610.49   | 1389.89   | 772.64    | 1.94         | 0.65                  | 1.18                  | 0.0155                 | 1                 | 0             |
| Pou6f1               | 1367.29   | 2314.23  | 510.72    | 1043.18   | 0.59         | 0.76                  | 0.37                  | 0.0161                 | 1                 | 1             |
| Kctd15               | 1023.42   | 1787.73  | 1085.50   | 1019.52   | 0.57         | 1.00                  | 1.06                  | 0.0162                 | 1                 | 1             |
| Vgll3                | 466.29    | 204.08   | 368.32    | 334.51    | 2.28         | 0.72                  | 0.79                  | 0.0164                 | 1                 | 1             |
| D130071O13Rik        | 396.65    | 584.48   | 223.09    | 312.97    | 0.68         | 0.79                  | 0.56                  | 0.0166                 | 1                 | 1             |
| Bnc2                 | 189.65    | 270.54   | 236.13    | 162.38    | 0.70         | 0.86                  | 1.25                  | 0.0167                 | 1                 | 1             |
| Smarcd3              | 285.71    | 810.69   | 218.19    | 421.78    | 0.35         | 1.48                  | 0.76                  | 0.0169                 | 1                 | 0             |
| Sept5                | 707.15    | 1108.52  | 561.63    | 989.85    | 0.64         | 1.40                  | 0.79                  | 0.0169                 | 1                 | 0             |
| Ccbl1                | 1393.60   | 912.26   | 2440.33   | 1000.53   | 1.53         | 0.72                  | 1.75                  | 0.0172                 | 1                 | 0             |
| Fosl2                | 1251.35   | 1975.83  | 1187.17   | 1549.13   | 0.63         | 1.24                  | 0.95                  | 0.0172                 | 1                 | 1             |
| Htr5b                | 229.76    | 145.63   | 500.23    | 119.43    | 1.58         | 0.52                  | 2.18                  | 0.0173                 | 1                 | 0             |
| Samd14               | 1832.30   | 2720.44  | 1726.71   | 1766.89   | 0.67         | 0.96                  | 0.94                  | 0.0174                 | 1                 | 1             |
| Wnt7a                | 2319.23   | 668.78   | 1829.66   | 4527.93   | 3.47         | 1.95                  | 0.79                  | 0.0175                 | 1                 | 1             |
| EG629383             | 989.51    | 1680.71  | 1906.11   | 1894.07   | 0.59         | 1.91                  | 1.93                  | 0.0176                 | 0                 | 0             |
| Sparc                | 2321.54   | 4608.30  | 602.03    | 2437.60   | 0.50         | 1.05                  | 0.26                  | 0.0177                 | 1                 | 1             |
| Ppp1r9b              | 748.08    | 1219.26  | 986.87    | 795.13    | 0.61         | 1.06                  | 1.32                  | 0.0177                 | 1                 | 1             |
| Ctsa                 | 344.64    | 504.22   | 331.06    | 314.90    | 0.68         | 0.91                  | 0.96                  | 0.0177                 | 1                 | 1             |
| Zkscan1              | 521.96    | 731.94   | 553.62    | 573.73    | 0.71         | 1.10                  | 1.06                  | 0.0180                 | 1                 | 1             |
| Gm22                 | 366.21    | 603.67   | 626.28    | 791.15    | 0.61         | 2.16                  | 1.71                  | 0.0181                 | 1                 | 0             |
| Tmie                 | 439.81    | 282.76   | 532.07    | 482.08    | 1.56         | 1.10                  | 1.21                  | 0.0182                 | 1                 | 1             |
| Dlx1                 | 191.07    | 342.82   | 156.33    | 178.13    | 0.56         | 0.93                  | 0.82                  | 0.0184                 | 1                 | 1             |
| Met                  | 591.39    | 956.12   | 685.27    | 704.25    | 0.62         | 1.19                  | 1.16                  | 0.0185                 | 1                 | 1             |
| Ripk4                | 6244.91   | 3818.70  | 5820.57   | 6463.02   | 1.64         | 1.03                  | 0.93                  | 0.0186                 | 1                 | 1             |
| Tgfb1i1              | 225.83    | 341.22   | 219.18    | 396.90    | 0.66         | 1.76                  | 0.97                  | 0.0187                 | 1                 | 0             |
| Tnc                  | 261.11    | 494.71   | 1046.94   | 242.67    | 0.53         | 0.93                  | 4.01                  | 0.0189                 | 0                 | 1             |
| Casp14               | 1859.67   | 840.16   | 318.09    | 2095.38   | 2.21         | 1.13                  | 0.17                  | 0.0192                 | 0                 | 1             |
| 4933428A15Rik        | 2742.81   | 1235.04  | 2454.46   | 928.70    | 2.22         | 0.34                  | 0.89                  | 0.0194                 | 1                 | 0             |
| Dennd2a              | 2154.00   | 4814.95  | 1146.30   | 2816.45   | 0.45         | 1.31                  | 0.53                  | 0.0194                 | 1                 | 1             |
| Abi2                 | 1643.30   | 2572.67  | 2299.50   | 1450.12   | 0.64         | 0.88                  | 1.40                  | 0.0196                 | 0                 | 1             |
| 2300008H03Rik        | 319.65    | 220.45   | 252.22    | 234.33    | 1.45         | 0.73                  | 0.79                  | 0.0197                 | 1                 | 0             |
| Fgf13                | 462.99    | 227.94   | 455.50    | 258.61    | 2.03         | 0.56                  | 0.98                  | 0.0197                 | 1                 | 0             |
| Leprel1              | 397.12    | 691.22   | 253.02    | 286.71    | 0.57         | 0.72                  | 0.64                  | 0.0199                 | 1                 | 1             |
| Rasl11b              | 12934.72  | 19759.72 | 9767.98   | 12571.04  | 0.65         | 0.97                  | 0.76                  | 0.0203                 | 1                 | 1             |
| H2-BI                | 182.64    | 124.52   | 284.22    | 199.25    | 1.47         | 1.09                  | 1.56                  | 0.0203                 | 1                 | 1             |
| Mcf2l                | 209.13    | 313.32   | 216.09    | 232.69    | 0.67         | 1.11                  | 1.03                  | 0.0206                 | 1                 | 1             |
| Serpinb6b            | 190.11    | 134.71   | 162.17    | 154.48    | 1.41         | 0.81                  | 0.85                  | 0.0212                 | 1                 | 1             |
| Ctnbp2nl             | 3189.12   | 2209.78  | 3362.29   | 5675.13   | 1.44         | 1.78                  | 1.05                  | 0.0214                 | 1                 | 1             |
| 4933428D01Rik        | 197.26    | 139.35   | 159.96    | 143.59    | 1.42         | 0.73                  | 0.81                  | 0.0214                 | 1                 | 0             |
| Serpina3h            | 397.46    | 1797.36  | 400.87    | 420.16    | 0.22         | 1.06                  | 1.01                  | 0.0215                 | 1                 | 1             |
| Mslnl                | 254.09    | 156.41   | 414.18    | 421.85    | 1.62         | 1.66                  | 1.63                  | 0.0216                 | 1                 | 1             |
| 6330408J11Rik        | 511.67    | 326.79   | 545.99    | 584.53    | 1.57         | 1.14                  | 1.07                  | 0.0217                 | 1                 | 1             |
| Pemt                 | 539.55    | 379.19   | 580.20    | 397.21    | 1.42         | 0.74                  | 1.08                  | 0.0218                 | 1                 | 0             |
| 1600002K03Rik        | 2433.90   | 1669.39  | 2419.73   | 2311.54   | 1.46         | 0.95                  | 0.99                  | 0.0218                 | 1                 | 1             |

| Gene name (Illumina) | Averages  |          |           |           | Fold changes |                       |                       | ttest<br>Con vs.<br>KD | Rescue success in |               |
|----------------------|-----------|----------|-----------|-----------|--------------|-----------------------|-----------------------|------------------------|-------------------|---------------|
|                      | Grhl2-Con | Grhl2-KD | Grhl2-Res | Ovol2-Res | Con/KD       | Ovol2-<br>Res/<br>Con | Grhl2-<br>Res/<br>Con |                        | Grhl2-<br>Res     | Ovol2-<br>Res |
| Upk3b                | 500.98    | 314.05   | 2750.03   | 401.62    | 1.60         | 0.80                  | 5.49                  | 0.0219                 | 1                 | 1             |
| Tox                  | 256.95    | 410.79   | 207.39    | 208.00    | 0.63         | 0.81                  | 0.81                  | 0.0221                 | 1                 | 1             |
| Scly                 | 716.11    | 1283.78  | 806.80    | 756.22    | 0.56         | 1.06                  | 1.13                  | 0.0223                 | 1                 | 1             |
| Depdc1b              | 726.82    | 1083.18  | 957.83    | 887.57    | 0.67         | 1.22                  | 1.32                  | 0.0225                 | 1                 | 1             |
| Grhl2                | 2023.61   | 672.93   | 387.48    | 1006.21   | 3.01         | 0.50                  | 0.19                  | 0.0227                 | 0                 | 0             |
| Mxd3                 | 343.90    | 674.19   | 317.66    | 406.70    | 0.51         | 1.18                  | 0.92                  | 0.0227                 | 1                 | 1             |
| LOC100044221         | 1639.90   | 1041.22  | 1865.41   | 1951.48   | 1.57         | 1.19                  | 1.14                  | 0.0227                 | 1                 | 1             |
| Akr1c12              | 511.36    | 917.29   | 379.69    | 689.48    | 0.56         | 1.35                  | 0.74                  | 0.0228                 | 1                 | 1             |
| 9130211I03Rik        | 235.20    | 427.15   | 285.14    | 256.61    | 0.55         | 1.09                  | 1.21                  | 0.0229                 | 1                 | 1             |
| 1700016K19Rik        | 267.93    | 175.21   | 285.54    | 296.39    | 1.53         | 1.11                  | 1.07                  | 0.0231                 | 1                 | 1             |
| 1810019J16Rik        | 544.23    | 298.48   | 588.60    | 660.23    | 1.82         | 1.21                  | 1.08                  | 0.0232                 | 1                 | 1             |
| Btn1a1               | 289.47    | 168.32   | 169.21    | 374.72    | 1.72         | 1.29                  | 0.58                  | 0.0235                 | 0                 | 1             |
| Tmprss2              | 4776.12   | 1428.19  | 3370.01   | 2362.57   | 3.34         | 0.49                  | 0.71                  | 0.0238                 | 1                 | 0             |
| Tmem102              | 855.06    | 566.65   | 1259.43   | 831.80    | 1.51         | 0.97                  | 1.47                  | 0.0238                 | 1                 | 1             |
| Sav1                 | 7734.73   | 12696.80 | 8378.33   | 8067.03   | 0.61         | 1.04                  | 1.08                  | 0.0239                 | 1                 | 1             |
| Stxbp5               | 841.74    | 538.20   | 867.86    | 631.68    | 1.56         | 0.75                  | 1.03                  | 0.0239                 | 1                 | 1             |
| Sgms2                | 640.73    | 413.67   | 534.56    | 849.05    | 1.55         | 1.33                  | 0.83                  | 0.0239                 | 1                 | 1             |
| Apbb2                | 818.43    | 1160.26  | 703.69    | 922.70    | 0.71         | 1.13                  | 0.86                  | 0.0240                 | 1                 | 1             |
| Tbc1d2               | 804.01    | 342.96   | 1062.19   | 867.51    | 2.34         | 1.08                  | 1.32                  | 0.0240                 | 1                 | 1             |
| Pmvk                 | 1825.48   | 1293.48  | 1572.16   | 1229.82   | 1.41         | 0.67                  | 0.86                  | 0.0241                 | 1                 | 0             |
| A430106B04Rik        | 374.97    | 539.60   | 321.91    | 539.15    | 0.69         | 1.44                  | 0.86                  | 0.0242                 | 1                 | 0             |
| D930046M13Rik        | 400.30    | 709.10   | 287.26    | 486.67    | 0.56         | 1.22                  | 0.72                  | 0.0243                 | 1                 | 1             |
| Apccd1               | 150.39    | 307.40   | 178.02    | 156.72    | 0.49         | 1.04                  | 1.18                  | 0.0243                 | 1                 | 1             |
| Cdkn1a               | 4892.51   | 2405.32  | 4595.29   | 5408.69   | 2.03         | 1.11                  | 0.94                  | 0.0245                 | 1                 | 1             |
| 1700105P06Rik        | 236.64    | 352.19   | 287.70    | 242.69    | 0.67         | 1.03                  | 1.22                  | 0.0245                 | 0                 | 1             |
| Prom2                | 476.68    | 169.81   | 567.14    | 176.57    | 2.81         | 0.37                  | 1.19                  | 0.0249                 | 1                 | 0             |
| Moxd1                | 301.50    | 193.77   | 706.94    | 491.94    | 1.56         | 1.63                  | 2.34                  | 0.0251                 | 1                 | 1             |
| Cic                  | 391.61    | 631.37   | 446.68    | 405.04    | 0.62         | 1.03                  | 1.14                  | 0.0254                 | 1                 | 1             |
| Dysf                 | 481.50    | 739.55   | 481.89    | 323.23    | 0.65         | 0.67                  | 1.00                  | 0.0256                 | 1                 | 1             |
| 2310028O11Rik        | 250.85    | 354.97   | 315.84    | 298.98    | 0.71         | 1.19                  | 1.26                  | 0.0258                 | 1                 | 1             |
| Ramp2                | 373.61    | 772.45   | 274.98    | 423.97    | 0.48         | 1.13                  | 0.74                  | 0.0259                 | 1                 | 1             |
| 4632428D17Rik        | 236.01    | 388.95   | 141.46    | 242.94    | 0.61         | 1.03                  | 0.60                  | 0.0259                 | 1                 | 1             |
| EG666756             | 8374.86   | 5691.37  | 6766.79   | 7390.58   | 1.47         | 0.88                  | 0.81                  | 0.0261                 | 1                 | 1             |
| Fam102a              | 2420.97   | 1476.93  | 2848.61   | 1980.33   | 1.64         | 0.82                  | 1.18                  | 0.0261                 | 1                 | 1             |
| Fermt2               | 2004.72   | 2980.48  | 2112.09   | 2096.07   | 0.67         | 1.05                  | 1.05                  | 0.0267                 | 1                 | 1             |
| 1500002O10Rik        | 272.34    | 435.05   | 191.12    | 233.20    | 0.63         | 0.86                  | 0.70                  | 0.0269                 | 1                 | 1             |
| Nnmt                 | 845.14    | 1647.67  | 234.63    | 1156.05   | 0.51         | 1.37                  | 0.28                  | 0.0270                 | 1                 | 1             |
| Sephs1               | 224.82    | 370.43   | 286.82    | 321.25    | 0.61         | 1.43                  | 1.28                  | 0.0270                 | 0                 | 0             |
| Vim                  | 919.22    | 3957.28  | 408.97    | 1463.84   | 0.23         | 1.59                  | 0.44                  | 0.0270                 | 1                 | 1             |
| Rhpn2                | 685.37    | 341.07   | 259.24    | 857.26    | 2.01         | 1.25                  | 0.38                  | 0.0272                 | 0                 | 1             |
| 1110012J17Rik        | 1101.81   | 2026.12  | 451.71    | 692.50    | 0.54         | 0.63                  | 0.41                  | 0.0272                 | 1                 | 1             |
| 1110018J23Rik        | 1699.53   | 3157.95  | 1301.49   | 1387.02   | 0.54         | 0.82                  | 0.77                  | 0.0273                 | 1                 | 1             |
| Dcbld1               | 1561.79   | 898.61   | 1740.85   | 1344.43   | 1.74         | 0.86                  | 1.11                  | 0.0274                 | 1                 | 1             |
| Pus7l                | 1946.70   | 1277.82  | 2242.30   | 1869.28   | 1.52         | 0.96                  | 1.15                  | 0.0278                 | 1                 | 1             |
| BC004044             | 377.28    | 764.12   | 334.65    | 381.01    | 0.49         | 1.01                  | 0.89                  | 0.0280                 | 1                 | 1             |
| 4631426J05Rik        | 246.41    | 516.22   | 212.79    | 201.89    | 0.48         | 0.82                  | 0.86                  | 0.0280                 | 1                 | 1             |
| Npy                  | 181.50    | 356.70   | 196.24    | 155.49    | 0.51         | 0.86                  | 1.08                  | 0.0280                 | 1                 | 1             |

| Gene name (Illumina) | Averages  |          |           |           | Fold changes |                       |                       | ttest<br>Con vs.<br>KD | Rescue success in |               |
|----------------------|-----------|----------|-----------|-----------|--------------|-----------------------|-----------------------|------------------------|-------------------|---------------|
|                      | Grhl2-Con | Grhl2-KD | Grhl2-Res | Ovol2-Res | Con/KD       | Ovol2-<br>Res/<br>Con | Grhl2-<br>Res/<br>Con |                        | Grhl2-<br>Res     | Ovol2-<br>Res |
| Zdhhc13              | 3346.01   | 2340.81  | 2472.83   | 2686.93   | 1.43         | 0.80                  | 0.74                  | 0.0281                 | 0                 | 1             |
| Ctxn1                | 1389.75   | 2479.68  | 1550.83   | 2133.74   | 0.56         | 1.54                  | 1.12                  | 0.0281                 | 1                 | 1             |
| 6430514L14Rik        | 242.16    | 363.67   | 194.84    | 285.21    | 0.67         | 1.18                  | 0.80                  | 0.0282                 | 1                 | 1             |
| Tnni2                | 527.57    | 204.56   | 255.29    | 301.13    | 2.58         | 0.57                  | 0.48                  | 0.0283                 | 0                 | 1             |
| Slc45a3              | 671.08    | 477.24   | 761.03    | 809.35    | 1.41         | 1.21                  | 1.13                  | 0.0284                 | 1                 | 1             |
| Plek2                | 1258.45   | 857.27   | 1694.90   | 2179.23   | 1.47         | 1.73                  | 1.35                  | 0.0285                 | 1                 | 1             |
| Axud1                | 2286.68   | 1604.15  | 2641.86   | 2619.53   | 1.43         | 1.15                  | 1.16                  | 0.0285                 | 1                 | 1             |
| Sgk2                 | 280.15    | 186.42   | 219.17    | 202.94    | 1.50         | 0.72                  | 0.78                  | 0.0285                 | 1                 | 0             |
| Tmem62               | 1427.00   | 981.45   | 1073.67   | 1085.40   | 1.45         | 0.76                  | 0.75                  | 0.0286                 | 1                 | 0             |
| Klf5                 | 3920.03   | 2047.78  | 4198.52   | 5677.42   | 1.91         | 1.45                  | 1.07                  | 0.0287                 | 1                 | 1             |
| Adi1                 | 3227.26   | 2289.06  | 3099.96   | 2046.32   | 1.41         | 0.63                  | 0.96                  | 0.0288                 | 1                 | 0             |
| Rnf144a              | 599.36    | 1180.74  | 325.02    | 827.59    | 0.51         | 1.38                  | 0.54                  | 0.0289                 | 1                 | 1             |
| Bex4                 | 8089.15   | 4746.78  | 10412.28  | 6612.33   | 1.70         | 0.82                  | 1.29                  | 0.0290                 | 1                 | 1             |
| G430005B15Rik        | 809.38    | 1167.71  | 437.46    | 718.11    | 0.69         | 0.89                  | 0.54                  | 0.0292                 | 1                 | 1             |
| LOC545481            | 523.98    | 236.42   | 399.35    | 748.78    | 2.22         | 1.43                  | 0.76                  | 0.0293                 | 1                 | 1             |
| 3110018K01Rik        | 205.85    | 333.42   | 133.03    | 195.54    | 0.62         | 0.95                  | 0.65                  | 0.0294                 | 1                 | 1             |
| Hebp2                | 817.86    | 567.47   | 1370.58   | 486.41    | 1.44         | 0.59                  | 1.68                  | 0.0294                 | 1                 | 0             |
| LOC670044            | 995.10    | 1452.86  | 1117.95   | 1205.43   | 0.68         | 1.21                  | 1.12                  | 0.0294                 | 1                 | 1             |
| Sim2                 | 6282.45   | 12179.20 | 6061.98   | 5243.90   | 0.52         | 0.83                  | 0.96                  | 0.0299                 | 1                 | 1             |
| Zbtb32               | 214.95    | 141.08   | 155.87    | 298.51    | 1.52         | 1.39                  | 0.73                  | 0.0299                 | 0                 | 1             |
| 2210011C24Rik        | 830.91    | 541.96   | 427.85    | 1155.73   | 1.53         | 1.39                  | 0.51                  | 0.0301                 | 0                 | 1             |
| Ppif                 | 6250.40   | 4046.84  | 7818.45   | 7113.82   | 1.54         | 1.14                  | 1.25                  | 0.0302                 | 1                 | 1             |
| Plau                 | 5915.56   | 1783.24  | 2892.10   | 4596.35   | 3.32         | 0.78                  | 0.49                  | 0.0306                 | 1                 | 1             |
| Enc1                 | 3678.34   | 5346.09  | 4435.33   | 3775.26   | 0.69         | 1.03                  | 1.21                  | 0.0307                 | 1                 | 1             |
| Pdgfa                | 6602.75   | 9350.71  | 7950.47   | 6072.48   | 0.71         | 0.92                  | 1.20                  | 0.0311                 | 1                 | 1             |
| Tmem79               | 3309.14   | 1869.32  | 6212.54   | 3096.39   | 1.77         | 0.94                  | 1.88                  | 0.0313                 | 1                 | 1             |
| Lama3                | 1421.67   | 400.34   | 1226.41   | 2987.41   | 3.55         | 2.10                  | 0.86                  | 0.0313                 | 1                 | 1             |
| Fkbp5                | 758.37    | 1071.89  | 894.58    | 641.93    | 0.71         | 0.85                  | 1.18                  | 0.0316                 | 1                 | 1             |
| Itpk1                | 1491.08   | 2136.05  | 2161.23   | 1618.69   | 0.70         | 1.09                  | 1.45                  | 0.0319                 | 1                 | 1             |
| Rhob                 | 2290.39   | 3947.34  | 1895.14   | 3470.66   | 0.58         | 1.52                  | 0.83                  | 0.0319                 | 1                 | 1             |
| Ivns1abp             | 3852.91   | 5721.81  | 4010.62   | 3877.99   | 0.67         | 1.01                  | 1.04                  | 0.0320                 | 1                 | 1             |
| Grb10                | 611.85    | 1124.39  | 321.92    | 326.37    | 0.54         | 0.53                  | 0.53                  | 0.0321                 | 1                 | 1             |
| Spsb2                | 555.36    | 851.43   | 627.47    | 581.57    | 0.65         | 1.05                  | 1.13                  | 0.0321                 | 1                 | 1             |
| Spag1                | 462.66    | 323.31   | 965.25    | 436.06    | 1.43         | 0.94                  | 2.09                  | 0.0323                 | 1                 | 1             |
| 2610528J11Rik        | 334.17    | 155.78   | 325.76    | 505.09    | 2.15         | 1.51                  | 0.97                  | 0.0326                 | 1                 | 1             |
| sci0002540.1_6       | 416.74    | 817.88   | 191.00    | 377.34    | 0.51         | 0.91                  | 0.46                  | 0.0326                 | 1                 | 1             |
| Lhfp12               | 2359.54   | 3787.57  | 1426.15   | 2159.25   | 0.62         | 0.92                  | 0.60                  | 0.0326                 | 1                 | 1             |
| D10Erttd516e         | 799.26    | 1157.94  | 893.72    | 854.82    | 0.69         | 1.07                  | 1.12                  | 0.0330                 | 1                 | 1             |
| Slc2a1               | 12256.50  | 7680.47  | 12396.61  | 17975.46  | 1.60         | 1.47                  | 1.01                  | 0.0337                 | 1                 | 1             |
| Gipc2                | 1620.04   | 1025.61  | 1518.52   | 467.98    | 1.58         | 0.29                  | 0.94                  | 0.0340                 | 1                 | 0             |
| LOC638301            | 454.15    | 264.34   | 355.61    | 404.03    | 1.72         | 0.89                  | 0.78                  | 0.0341                 | 1                 | 1             |
| 2610009E16Rik        | 3146.91   | 5630.57  | 3089.30   | 3093.67   | 0.56         | 0.98                  | 0.98                  | 0.0342                 | 1                 | 1             |
| 9130204C11Rik        | 322.68    | 480.02   | 341.17    | 464.58    | 0.67         | 1.44                  | 1.06                  | 0.0343                 | 1                 | 0             |
| LOC100046395         | 3378.39   | 2341.54  | 2619.57   | 2359.80   | 1.44         | 0.70                  | 0.78                  | 0.0344                 | 0                 | 0             |
| 5930429A15Rik        | 276.98    | 450.29   | 208.67    | 369.58    | 0.62         | 1.33                  | 0.75                  | 0.0350                 | 1                 | 1             |
| Dscr1                | 1526.76   | 2403.64  | 2086.57   | 1434.78   | 0.64         | 0.94                  | 1.37                  | 0.0350                 | 1                 | 1             |
| Oas1g                | 475.39    | 299.44   | 751.39    | 456.27    | 1.59         | 0.96                  | 1.58                  | 0.0353                 | 1                 | 1             |

| Gene name (Illumina) | Averages  |          |           |           | Fold changes |                       |                       | ttest<br>Con vs.<br>KD | Rescue success in |               |
|----------------------|-----------|----------|-----------|-----------|--------------|-----------------------|-----------------------|------------------------|-------------------|---------------|
|                      | Grhl2-Con | Grhl2-KD | Grhl2-Res | Ovol2-Res | Con/KD       | Ovol2-<br>Res/<br>Con | Grhl2-<br>Res/<br>Con |                        | Grhl2-<br>Res     | Ovol2-<br>Res |
| Tgm1                 | 1074.94   | 364.15   | 737.07    | 2315.24   | 2.95         | 2.15                  | 0.69                  | 0.0353                 | 1                 | 1             |
| 4930445K14Rik        | 441.63    | 658.24   | 498.27    | 565.67    | 0.67         | 1.28                  | 1.13                  | 0.0354                 | 1                 | 1             |
| Ifit3                | 5213.28   | 9967.33  | 4937.22   | 4405.54   | 0.52         | 0.85                  | 0.95                  | 0.0354                 | 1                 | 1             |
| Ddr1                 | 2063.41   | 2939.59  | 1744.97   | 1951.65   | 0.70         | 0.95                  | 0.85                  | 0.0357                 | 1                 | 1             |
| Dpysl2               | 2214.80   | 3334.80  | 1510.31   | 1804.15   | 0.66         | 0.81                  | 0.68                  | 0.0358                 | 1                 | 1             |
| Fgd6                 | 454.12    | 282.54   | 450.36    | 550.65    | 1.61         | 1.21                  | 0.99                  | 0.0359                 | 1                 | 1             |
| Pias3                | 1657.76   | 2593.21  | 1468.32   | 1664.86   | 0.64         | 1.00                  | 0.89                  | 0.0361                 | 1                 | 1             |
| Nedd4b               | 151.18    | 219.60   | 168.48    | 157.05    | 0.69         | 1.04                  | 1.11                  | 0.0361                 | 1                 | 1             |
| 4833409N03Rik        | 1800.93   | 2719.13  | 2065.25   | 1595.25   | 0.66         | 0.89                  | 1.15                  | 0.0361                 | 1                 | 1             |
| Elfn1                | 169.82    | 310.07   | 287.23    | 185.24    | 0.55         | 1.09                  | 1.69                  | 0.0361                 | 0                 | 1             |
| Ggt7                 | 161.81    | 267.34   | 197.86    | 199.24    | 0.61         | 1.23                  | 1.22                  | 0.0363                 | 1                 | 1             |
| 2610528B01Rik        | 336.63    | 480.99   | 340.25    | 353.29    | 0.70         | 1.05                  | 1.01                  | 0.0364                 | 1                 | 1             |
| Col16a1              | 481.10    | 826.13   | 564.94    | 626.59    | 0.58         | 1.30                  | 1.17                  | 0.0364                 | 1                 | 1             |
| 2310043J07Rik        | 1388.71   | 482.71   | 1609.16   | 1325.01   | 2.88         | 0.95                  | 1.16                  | 0.0366                 | 1                 | 1             |
| Plekho2              | 371.52    | 577.34   | 321.06    | 409.28    | 0.64         | 1.10                  | 0.86                  | 0.0369                 | 1                 | 1             |
| Itga2                | 199.87    | 139.75   | 242.32    | 239.23    | 1.43         | 1.20                  | 1.21                  | 0.0369                 | 1                 | 1             |
| 4933436C20Rik        | 314.51    | 540.34   | 267.13    | 169.57    | 0.58         | 0.54                  | 0.85                  | 0.0370                 | 1                 | 1             |
| Smad6                | 624.42    | 1026.61  | 688.87    | 709.96    | 0.61         | 1.14                  | 1.10                  | 0.0371                 | 1                 | 1             |
| Tgfb3                | 358.83    | 553.83   | 428.95    | 298.97    | 0.65         | 0.83                  | 1.20                  | 0.0375                 | 1                 | 1             |
| Ankrd13d             | 374.06    | 573.42   | 886.61    | 377.83    | 0.65         | 1.01                  | 2.37                  | 0.0377                 | 0                 | 1             |
| Tmem159              | 677.14    | 432.24   | 691.94    | 427.14    | 1.57         | 0.63                  | 1.02                  | 0.0378                 | 1                 | 0             |
| Serpina3g            | 169.49    | 445.09   | 145.38    | 161.06    | 0.38         | 0.95                  | 0.86                  | 0.0381                 | 1                 | 1             |
| AI480653             | 978.19    | 1423.48  | 1252.58   | 1209.51   | 0.69         | 1.24                  | 1.28                  | 0.0381                 | 1                 | 1             |
| Sdcbp2               | 391.18    | 161.49   | 382.84    | 1217.35   | 2.42         | 3.11                  | 0.98                  | 0.0381                 | 1                 | 1             |
| C130057N11Rik        | 583.49    | 824.52   | 670.41    | 670.89    | 0.71         | 1.15                  | 1.15                  | 0.0381                 | 1                 | 1             |
| Mb                   | 204.31    | 144.81   | 333.20    | 172.23    | 1.41         | 0.84                  | 1.63                  | 0.0382                 | 1                 | 1             |
| Lbh                  | 1397.14   | 2887.46  | 868.49    | 2227.01   | 0.48         | 1.59                  | 0.62                  | 0.0383                 | 1                 | 1             |
| Cox7a2l              | 3208.95   | 5682.85  | 6005.51   | 5362.96   | 0.56         | 1.67                  | 1.87                  | 0.0386                 | 0                 | 0             |
| C130073O12Rik        | 383.46    | 245.55   | 411.92    | 257.60    | 1.56         | 0.67                  | 1.07                  | 0.0386                 | 1                 | 1             |
| Col4a3               | 1555.53   | 1009.28  | 1830.66   | 1042.78   | 1.54         | 0.67                  | 1.18                  | 0.0387                 | 1                 | 0             |
| Cysl1r1              | 205.14    | 129.08   | 222.59    | 149.40    | 1.59         | 0.73                  | 1.09                  | 0.0388                 | 1                 | 1             |
| Lepre1               | 208.73    | 299.71   | 193.85    | 178.97    | 0.70         | 0.86                  | 0.93                  | 0.0388                 | 1                 | 1             |
| Gata3                | 211.53    | 384.27   | 390.28    | 241.07    | 0.55         | 1.14                  | 1.85                  | 0.0389                 | 1                 | 1             |
| Cdcp1                | 447.83    | 291.59   | 380.24    | 376.46    | 1.54         | 0.84                  | 0.85                  | 0.0389                 | 1                 | 1             |
| Chst7                | 371.89    | 257.29   | 851.67    | 359.37    | 1.45         | 0.97                  | 2.29                  | 0.0390                 | 1                 | 1             |
| 1500005K14Rik        | 1152.89   | 719.88   | 1499.50   | 1099.76   | 1.60         | 0.95                  | 1.30                  | 0.0390                 | 1                 | 1             |
| St3gal2              | 334.03    | 491.03   | 278.83    | 287.40    | 0.68         | 0.86                  | 0.83                  | 0.0391                 | 1                 | 1             |
| Ppap2c               | 14917.20  | 10191.82 | 12215.81  | 12591.07  | 1.46         | 0.84                  | 0.82                  | 0.0392                 | 1                 | 1             |
| Pmepa1               | 514.94    | 355.81   | 446.65    | 427.09    | 1.45         | 0.83                  | 0.87                  | 0.0393                 | 1                 | 1             |
| Ddit4                | 4412.13   | 1921.04  | 4665.58   | 4184.31   | 2.30         | 0.95                  | 1.06                  | 0.0394                 | 1                 | 1             |
| Sprr2g               | 611.67    | 308.18   | 381.77    | 937.99    | 1.98         | 1.53                  | 0.62                  | 0.0394                 | 1                 | 1             |
| BC025546             | 4778.02   | 3311.96  | 3609.35   | 4158.56   | 1.44         | 0.87                  | 0.76                  | 0.0395                 | 0                 | 1             |
| Gjb3                 | 4662.03   | 2083.38  | 3929.04   | 4831.35   | 2.24         | 1.04                  | 0.84                  | 0.0397                 | 1                 | 1             |
| Ckmt1                | 237.95    | 156.58   | 259.20    | 359.92    | 1.52         | 1.51                  | 1.09                  | 0.0397                 | 1                 | 1             |
| Mcc                  | 363.91    | 578.94   | 448.07    | 292.60    | 0.63         | 0.80                  | 1.23                  | 0.0398                 | 1                 | 1             |
| 4432405B04Rik        | 499.37    | 916.23   | 530.37    | 531.11    | 0.55         | 1.06                  | 1.06                  | 0.0399                 | 1                 | 1             |
| Ntn4                 | 217.85    | 318.28   | 248.77    | 191.35    | 0.68         | 0.88                  | 1.14                  | 0.0400                 | 1                 | 1             |



| Gene name (Illumina) | Averages  |          |           |           | Fold changes |                       |                       | ttest<br>Con vs.<br>KD | Rescue success in |               |
|----------------------|-----------|----------|-----------|-----------|--------------|-----------------------|-----------------------|------------------------|-------------------|---------------|
|                      | Grhl2-Con | Grhl2-KD | Grhl2-Res | Ovol2-Res | Con/KD       | Ovol2-<br>Res/<br>Con | Grhl2-<br>Res/<br>Con |                        | Grhl2-<br>Res     | Ovol2-<br>Res |
| 4732458O05Rik        | 437.47    | 625.27   | 441.19    | 1058.37   | 0.70         | 2.42                  | 1.01                  | 0.0400                 | 1                 | 0             |
| Sh3rf2               | 251.85    | 156.86   | 238.94    | 192.16    | 1.61         | 0.76                  | 0.95                  | 0.0402                 | 1                 | 1             |
| Fbxo33               | 1000.06   | 713.12   | 972.64    | 771.58    | 1.40         | 0.77                  | 0.97                  | 0.0404                 | 1                 | 1             |
| Usp12                | 326.14    | 480.16   | 368.00    | 351.82    | 0.68         | 1.08                  | 1.13                  | 0.0405                 | 1                 | 1             |
| Ramp3                | 1462.19   | 781.85   | 1272.85   | 1756.43   | 1.87         | 1.20                  | 0.87                  | 0.0406                 | 1                 | 1             |
| Ankrd47              | 1510.70   | 748.16   | 1277.63   | 1511.36   | 2.02         | 1.00                  | 0.85                  | 0.0409                 | 1                 | 1             |
| Sema5a               | 961.14    | 1930.65  | 699.01    | 563.87    | 0.50         | 0.59                  | 0.73                  | 0.0410                 | 1                 | 1             |
| Trim47               | 824.30    | 1278.63  | 1347.47   | 1124.21   | 0.64         | 1.36                  | 1.63                  | 0.0412                 | 0                 | 1             |
| Cxcl10               | 774.86    | 527.15   | 696.72    | 1045.00   | 1.47         | 1.35                  | 0.90                  | 0.0414                 | 1                 | 1             |
| 6430598A04Rik        | 247.90    | 349.30   | 300.35    | 355.03    | 0.71         | 1.43                  | 1.21                  | 0.0414                 | 0                 | 0             |
| 2700084L06Rik        | 1941.54   | 2970.74  | 1926.84   | 2106.73   | 0.65         | 1.09                  | 0.99                  | 0.0414                 | 1                 | 1             |
| Palm                 | 871.77    | 1413.69  | 747.77    | 952.47    | 0.62         | 1.09                  | 0.86                  | 0.0417                 | 1                 | 1             |
| Gcnt3                | 304.84    | 179.64   | 215.19    | 192.99    | 1.70         | 0.63                  | 0.71                  | 0.0420                 | 1                 | 1             |
| Cdon                 | 456.57    | 722.60   | 447.60    | 386.90    | 0.63         | 0.85                  | 0.98                  | 0.0423                 | 1                 | 1             |
| LOC100038882         | 2020.76   | 1029.22  | 3186.11   | 1704.64   | 1.96         | 0.84                  | 1.58                  | 0.0430                 | 1                 | 1             |
| Cacnb3               | 624.56    | 911.62   | 657.71    | 746.73    | 0.69         | 1.20                  | 1.05                  | 0.0432                 | 1                 | 1             |
| Pcolce               | 1717.19   | 4416.04  | 771.30    | 1990.61   | 0.39         | 1.16                  | 0.45                  | 0.0432                 | 1                 | 1             |
| Marcks               | 3781.91   | 6033.78  | 6367.38   | 3994.79   | 0.63         | 1.06                  | 1.68                  | 0.0432                 | 1                 | 1             |
| Col6a1               | 230.99    | 828.54   | 162.82    | 314.13    | 0.28         | 1.36                  | 0.70                  | 0.0436                 | 1                 | 1             |
| Atoh8                | 184.58    | 506.81   | 210.69    | 150.45    | 0.36         | 0.82                  | 1.14                  | 0.0439                 | 1                 | 1             |
| Id3                  | 1495.49   | 2125.23  | 1375.94   | 1525.31   | 0.70         | 1.02                  | 0.92                  | 0.0440                 | 1                 | 1             |
| Mpnd                 | 2163.74   | 3153.35  | 2248.71   | 2100.41   | 0.69         | 0.97                  | 1.04                  | 0.0440                 | 1                 | 1             |
| Prss22               | 1787.42   | 206.48   | 2601.04   | 631.79    | 8.66         | 0.35                  | 1.46                  | 0.0442                 | 1                 | 1             |
| Krt17                | 333.32    | 216.55   | 636.61    | 2740.65   | 1.54         | 8.22                  | 1.91                  | 0.0442                 | 1                 | 1             |
| 2610202E01Rik        | 517.51    | 866.94   | 548.06    | 555.55    | 0.60         | 1.07                  | 1.06                  | 0.0444                 | 1                 | 1             |
| Figf                 | 165.88    | 365.97   | 142.91    | 192.16    | 0.45         | 1.16                  | 0.86                  | 0.0445                 | 1                 | 1             |
| Pdlim4               | 4340.38   | 6490.67  | 5648.01   | 5893.55   | 0.67         | 1.36                  | 1.30                  | 0.0447                 | 1                 | 1             |
| Ocln                 | 411.90    | 263.49   | 440.68    | 401.92    | 1.56         | 0.98                  | 1.07                  | 0.0450                 | 1                 | 1             |
| Cd40                 | 519.04    | 344.84   | 1078.62   | 741.84    | 1.51         | 1.43                  | 2.08                  | 0.0451                 | 1                 | 1             |
| Ece1                 | 963.16    | 1507.64  | 1148.27   | 900.12    | 0.64         | 0.93                  | 1.19                  | 0.0455                 | 1                 | 1             |
| 9330132O05Rik        | 586.64    | 918.98   | 520.85    | 708.97    | 0.64         | 1.21                  | 0.89                  | 0.0459                 | 1                 | 1             |
| LOC381770            | 210.73    | 300.65   | 201.13    | 175.69    | 0.70         | 0.83                  | 0.95                  | 0.0463                 | 1                 | 1             |
| Tacstd2              | 17451.86  | 8508.10  | 16845.38  | 14238.21  | 2.05         | 0.82                  | 0.97                  | 0.0464                 | 1                 | 1             |
| Trim8                | 6494.15   | 11981.84 | 7499.35   | 7097.34   | 0.54         | 1.09                  | 1.15                  | 0.0467                 | 1                 | 1             |
| S100a14              | 677.09    | 295.37   | 873.37    | 1477.00   | 2.29         | 2.18                  | 1.29                  | 0.0471                 | 1                 | 1             |
| Rab11fip5            | 5169.74   | 3314.83  | 5075.62   | 8175.23   | 1.56         | 1.58                  | 0.98                  | 0.0474                 | 1                 | 1             |
| Apc2                 | 158.24    | 226.35   | 167.41    | 179.36    | 0.70         | 1.13                  | 1.06                  | 0.0476                 | 1                 | 1             |
| AI661453             | 460.60    | 304.20   | 485.69    | 631.81    | 1.51         | 1.37                  | 1.05                  | 0.0481                 | 1                 | 1             |
| Ptms                 | 1099.12   | 1649.92  | 1156.90   | 1169.85   | 0.67         | 1.06                  | 1.05                  | 0.0483                 | 1                 | 1             |
| LOC236311            | 315.95    | 174.45   | 182.62    | 333.12    | 1.81         | 1.05                  | 0.58                  | 0.0483                 | 1                 | 1             |
| Hmgcr                | 608.93    | 386.42   | 388.79    | 389.90    | 1.58         | 0.64                  | 0.64                  | 0.0486                 | 0                 | 1             |
| Ppl                  | 2239.14   | 1473.39  | 1744.24   | 2002.74   | 1.52         | 0.89                  | 0.78                  | 0.0486                 | 1                 | 1             |
| 5830411G16Rik        | 1441.91   | 2022.66  | 2189.38   | 2332.49   | 0.71         | 1.62                  | 1.52                  | 0.0488                 | 0                 | 0             |
| Btbd6                | 2128.73   | 3222.50  | 2462.71   | 2553.08   | 0.66         | 1.20                  | 1.16                  | 0.0489                 | 1                 | 1             |
| Nupr1                | 13745.86  | 8663.44  | 8245.42   | 12653.05  | 1.59         | 0.92                  | 0.60                  | 0.0490                 | 0                 | 1             |
| Sox9                 | 3251.60   | 1562.51  | 3588.43   | 5224.90   | 2.08         | 1.61                  | 1.10                  | 0.0491                 | 1                 | 1             |
| Myl9                 | 175.05    | 248.93   | 233.72    | 257.03    | 0.70         | 1.47                  | 1.34                  | 0.0493                 | 1                 | 0             |

| Gene name (Illumina) | Averages  |          |           |           | Fold changes |                       |                       | ttest<br>Con vs.<br>KD | Rescue success in |               |
|----------------------|-----------|----------|-----------|-----------|--------------|-----------------------|-----------------------|------------------------|-------------------|---------------|
|                      | Grhl2-Con | Grhl2-KD | Grhl2-Res | Ovol2-Res | Con/KD       | Ovol2-<br>Res/<br>Con | Grhl2-<br>Res/<br>Con |                        | Grhl2-<br>Res     | Ovol2-<br>Res |
| Sdc2                 | 1073.55   | 1974.42  | 1182.44   | 742.40    | 0.54         | 0.69                  | 1.10                  | 0.0496                 | 1                 | 1             |
| Gm1673               | 2286.69   | 3853.44  | 1388.55   | 1434.51   | 0.59         | 0.63                  | 0.61                  | 0.0496                 | 1                 | 1             |

## Supplemental Table 2

### Gene ontology analysis on differentially expressed genes.

Gene ontology analysis for differentially expressed genes between Grhl2-Con and Grhl2-KD using the HOMER software package. GO terms with more than 500 genes or less than 2 genes in term have been excluded from the analysis as well as categories with less than 2 target genes in term.

| TermID     | Term                                                             | p-value | logP  | Genes in Term | Target Genes in Term | Gene Symbols                                                                                                                                          |
|------------|------------------------------------------------------------------|---------|-------|---------------|----------------------|-------------------------------------------------------------------------------------------------------------------------------------------------------|
| GO:0030855 | epithelial cell differentiation                                  | <0.0001 | -14.5 | 391           | 21                   | Sfn, Tmem79, Cdh1, Sprr2g, Sprr1a, Tgfb1i1, Ppl, Vim, Gata3, Fzd2, Stx2, Fam20c, Tgm1, Sav1, Id3, Klf5, Krt17, Map7, Sox9, Wnt7a, Anxa1               |
| GO:0032880 | regulation of protein localization                               | <0.0001 | -12.4 | 448           | 21                   | Pkia, Sfn, Pkdcc, Cdh1, Tmem184a, Krt20, Tgfb3, Rab11fip5, Gata3, Tgfb1, Ramp3, Btn1a1, Sema5a, Cd40, Apc2, Gper1, Wipf1, Cdkn1a, Pkd2, Nedd4l, Anxa1 |
| GO:0007507 | heart development                                                | <0.0001 | -12.3 | 413           | 20                   | Rbm20, Casp7, Ovol2, Mb, Cpe, Foxc1, Maml1, Tgfb1, Gata3, Fzd2, Smarcd3, Ece1, Grhl2, Sav1, Id3, Smad6, Ramp2, Wnt2, Pkd2, Sox9                       |
| GO:0043588 | skin development                                                 | <0.0001 | -12.1 | 249           | 15                   | Sfn, Tmem79, Tgm1, Apcdd1, Pdgfa, Sav1, Itga2, Sprr1a, Sprr2g, Prss8, Krt17, Sox9, Wnt7a, Anxa1, Ppl                                                  |
| GO:0031424 | keratinization                                                   | <0.0001 | -11.5 | 34            | 6                    | Sprr1a, Sprr2g, Sfn, Krt17, Tgm1, Ppl                                                                                                                 |
| GO:0030216 | keratinocyte differentiation                                     | <0.0001 | -11.5 | 71            | 8                    | Sfn, Tgm1, Sav1, Sprr2g, Sprr1a, Krt17, Ppl, Anxa1                                                                                                    |
| GO:2000027 | regulation of organ morphogenesis                                | <0.0001 | -11.2 | 147           | 11                   | Fzd2, Plau, Met, Cdh1, Pdgfa, Wnt2, Tacstd2, Sox9, Foxc1, Ntn4, Gata3                                                                                 |
| GO:0060693 | regulation of branching involved in salivary gland morphogenesis | <0.0001 | -11.1 | 11            | 4                    | Met, Cdh1, Pdgfa, Ntn4                                                                                                                                |
| GO:0070201 | regulation of establishment of protein localization              | <0.0001 | -11.1 | 375           | 18                   | Pkia, Sfn, Pkdcc, Cdh1, Krt20, Tgfb3, Gata3, Tgfb1, Ramp3, Btn1a1, Sema5a, Cd40, Apc2, Gper1, Wipf1, Cdkn1a, Pkd2, Anxa1                              |
| GO:0050678 | regulation of epithelial cell proliferation                      | <0.0001 | -11.1 | 239           | 14                   | Arg1, Plau, Cdh1, Sav1, Ovol2, Vash1, Wnt2, Stat1, Sox9, Twist2, Mcc, Wnt7a, Gata3, Tgfb1                                                             |
| GO:0060688 | regulation of morphogenesis of a branching structure             | <0.0001 | -10.9 | 56            | 7                    | Wnt2, Met, Cdh1, Tacstd2, Sox9, Pdgfa, Ntn4                                                                                                           |
| GO:0072659 | protein localization to plasma membrane                          | <0.0001 | -10.9 | 77            | 8                    | Cdh1, Ehd2, Fgf13, Palm, Krt18, Ramp2, Map7, Ramp3                                                                                                    |
| GO:0035295 | tube development                                                 | <0.0001 | -10.8 | 459           | 20                   | Pkdcc, Met, Cdh1, Pdgfa, Ovol2, Tgfb3, Ddr1, Stat1, Ctsh, Foxc1, Gata3, Sparc, Sema5a, Grhl2, Sav1, Zeb1, Sim2, Pkd2, Sox9, Wnt7a                     |
| GO:0051272 | positive regulation of cellular component movement               | <0.0001 | -10.6 | 284           | 15                   | Cxcl10, Plau, Cxcl16, Pdgfa, Fam110c, Figf, Gper1, S100a14, Itga2, Eph1, Sox9, Ctsh, Gata3, Tgfb1, Mcam                                               |

| TermID     | Term                                                 | p-value | logP  | Genes in Term | Target Genes in Term | Gene Symbols                                                                                                                            |
|------------|------------------------------------------------------|---------|-------|---------------|----------------------|-----------------------------------------------------------------------------------------------------------------------------------------|
| GO:0032386 | regulation of intracellular transport                | <0.0001 | -10.5 | 320           | 16                   | Pkia, Tmem102, Sfn, Pkdcc, Gsto1, Cdh1, Ehd2, Tgfb3, Tgfb3, Sema5a, Cxcl10, Apc2, Gper1, Wipf1, Cdkn1a, Pkd2                            |
| GO:0030334 | regulation of cell migration                         | <0.0001 | -10.4 | 471           | 20                   | Cdh1, Cxcl16, Pdgfa, Fam110c, Figf, Itga2, Eph1, Tacstd2, Vim, Ctsh, Gata3, Mcam, Lama3, Cxcl10, Plau, Gper1, S100a14, Vash1, Sox9, Mcc |
| GO:2000351 | regulation of endothelial cell apoptotic process     | <0.0001 | -10.0 | 27            | 5                    | Ramp2, Sema5a, Cd40, Gper1, Gata3                                                                                                       |
| GO:0007009 | plasma membrane organization                         | <0.0001 | -10.0 | 112           | 9                    | Cdh1, Ehd2, Dysf, Fgf13, Palm, Krt18, Ramp2, Map7, Ramp3                                                                                |
| GO:2000145 | regulation of cell motility                          | 0.0001  | -9.9  | 490           | 20                   | Cdh1, Cxcl16, Pdgfa, Fam110c, Figf, Itga2, Eph1, Tacstd2, Vim, Ctsh, Gata3, Mcam, Lama3, Cxcl10, Plau, Gper1, S100a14, Vash1, Sox9, Mcc |
| GO:0051223 | regulation of protein transport                      | 0.0001  | -9.8  | 339           | 16                   | Pkia, Sfn, Pkdcc, Cdh1, Krt20, Tgfb3, Gata3, Tgfb3, Btrn1a1, Sema5a, Cd40, Apc2, Wipf1, Cdkn1a, Pkd2, Anxa1                             |
| GO:0003206 | cardiac chamber morphogenesis                        | 0.0001  | -9.8  | 115           | 9                    | Fzd2, Smarcd3, Grhl2, Sav1, Ovol2, Wnt2, Cpe, Foxc1, Gata3                                                                              |
| GO:0030335 | positive regulation of cell migration                | 0.0001  | -9.7  | 271           | 14                   | Cxcl10, Plau, Cxcl16, Pdgfa, Fam110c, Figf, Gper1, S100a14, Itga2, Eph1, Sox9, Ctsh, Gata3, Mcam                                        |
| GO:0031344 | regulation of cell projection organization           | 0.0001  | -9.6  | 346           | 16                   | Met, Enc1, Klk8, Fam110c, Itga2, Tgfb3, Tacstd2, Vim, Sdc2, Gata3, Tgfb3, Ntm, Fgf13, Palm, Klf5, Wnt7a                                 |
| GO:2000147 | positive regulation of cell motility                 | 0.0001  | -9.5  | 276           | 14                   | Cxcl10, Plau, Cxcl16, Pdgfa, Fam110c, Figf, Gper1, S100a14, Itga2, Eph1, Sox9, Ctsh, Gata3, Mcam                                        |
| GO:0008544 | epidermis development                                | 0.0001  | -9.4  | 211           | 12                   | Sfn, Tgm1, Apcdd1, Pdgfa, Sav1, Sprr2g, Sprr1a, Prss8, Krt17, Sox9, Anxa1, Ppl                                                          |
| GO:0040017 | positive regulation of locomotion                    | 0.0001  | -9.1  | 288           | 14                   | Cxcl10, Plau, Cxcl16, Pdgfa, Fam110c, Figf, Gper1, S100a14, Itga2, Eph1, Sox9, Ctsh, Gata3, Mcam                                        |
| GO:0033157 | regulation of intracellular protein transport        | 0.0001  | -8.9  | 189           | 11                   | Pkia, Sfn, Pkdcc, Sema5a, Cdh1, Apc2, Wipf1, Cdkn1a, Tgfb3, Pkd2, Tgfb3                                                                 |
| GO:0050680 | negative regulation of epithelial cell proliferation | 0.0001  | -8.8  | 102           | 8                    | Cdh1, Sav1, Vash1, Stat1, Sox9, Mcc, Tgfb3, Gata3                                                                                       |
| GO:0003205 | cardiac chamber development                          | 0.0002  | -8.7  | 132           | 9                    | Fzd2, Smarcd3, Grhl2, Sav1, Ovol2, Wnt2, Cpe, Foxc1, Gata3                                                                              |
| GO:0034330 | cell junction organization                           | 0.0002  | -8.6  | 105           | 8                    | Lama3, Marveld3, Cdh1, Fermt2, Ramp2, Tgfb3, Ocln, Itgb4                                                                                |
| GO:0046822 | regulation of nucleocytoplasmic transport            | 0.0002  | -8.5  | 166           | 10                   | Pkia, Sfn, Sema5a, Cdh1, Apc2, Wipf1, Cdkn1a, Tgfb3, Pkd2, Tgfb3                                                                        |
| GO:0060021 | palate development                                   | 0.0002  | -8.5  | 81            | 7                    | Tgfb3, Fzd2, Pkdcc, Csrnp1, Bnc2, Wnt7a, Tgfb3                                                                                          |

| TermID     | Term                                             | p-value | logP | Genes in Term | Target Genes in Term | Gene Symbols                                                                                                      |
|------------|--------------------------------------------------|---------|------|---------------|----------------------|-------------------------------------------------------------------------------------------------------------------|
| GO:0072657 | protein localization to membrane                 | 0.0002  | -8.4 | 168           | 10                   | Cdh1, Ehd2, Fermt2, Fgf13, Palm, Krt18, Ramp2, Map7, Cpe, Ramp3                                                   |
| GO:0045765 | regulation of angiogenesis                       | 0.0003  | -8.2 | 172           | 10                   | Cxcl10, Sema5a, Rhob, Col4a3, Ramp2, Vash1, EphA1, Stat1, Cysl1r1, Ctsh                                           |
| GO:0003007 | heart morphogenesis                              | 0.0003  | -8.2 | 206           | 11                   | Fzd2, Smarcd3, Grhl2, Sav1, Ovol2, Pkd2, Wnt2, Sox9, Foxc1, Cpe, Gata3                                            |
| GO:0009913 | epidermal cell differentiation                   | 0.0003  | -8.1 | 114           | 8                    | Sfn, Tgm1, Sav1, Sprr2g, Sprr1a, Krt17, Ppl, Anxa1                                                                |
| GO:0001558 | regulation of cell growth                        | 0.0005  | -7.6 | 294           | 13                   | Wispl2, Sfn, Cda, Cxcl16, Fgf13, Ppp1r9b, Cdkn1a, Rrad, Ddr1, Krt17, Tnk1, Apbb2, Tgfbr1                          |
| GO:0007167 | enzyme linked receptor protein signaling pathway | 0.0005  | -7.6 | 413           | 16                   | Ddit4, Met, Csrnp1, Fermt2, Figf, Pdgfa, Tgfb3, Tgfb1i1, EphA1, Ddr1, Foxc1, Tgfbr1, Smad6, Sox9, Grb10, Stub1    |
| GO:1901342 | regulation of vasculature development            | 0.0005  | -7.5 | 188           | 10                   | Cxcl10, Sema5a, Rhob, Col4a3, Ramp2, Vash1, EphA1, Stat1, Cysl1r1, Ctsh                                           |
| GO:0001568 | blood vessel development                         | 0.0005  | -7.5 | 416           | 16                   | Figf, Pdgfa, Ovol2, EphA1, Foxc1, Tgfbr1, Sema5a, Plau, Rhob, Smad6, Klf5, Ramp2, Pkd2, Wnt2, Vash1, Wnt7a        |
| GO:0001944 | vasculature development                          | 0.0006  | -7.5 | 458           | 17                   | Figf, Pdgfa, Ovol2, EphA1, Foxc1, Tgfbr1, Fzd2, Sema5a, Plau, Rhob, Klf5, Smad6, Ramp2, Vash1, Wnt2, Pkd2, Wnt7a  |
| GO:0044802 | single-organism membrane organization            | 0.0006  | -7.4 | 338           | 14                   | Cdh1, Ehd2, Fermt2, Dysf, Fgf13, Palm, Gper1, Krt18, Ramp2, Ppif, Chrb1, Map7, Cpe, Ramp3                         |
| GO:0001501 | skeletal system development                      | 0.0006  | -7.4 | 379           | 15                   | Dlx1, Sparc, Pkdcc, Thbs3, Csrnp1, Grhl2, Fam20c, Bnc2, Zeb1, Tgfb3, Sox9, Twist2, Wnt7a, Foxc1, Tgfbr1           |
| GO:0060491 | regulation of cell projection assembly           | 0.0006  | -7.4 | 70            | 6                    | Tgfb3, Tacstd2, Fam110c, Palm, Klf5, Tgfbr1                                                                       |
| GO:0032410 | negative regulation of transporter activity      | 0.0006  | -7.3 | 27            | 4                    | Ppif, Pkd2, Nedd4l, Gsto1                                                                                         |
| GO:0061061 | muscle structure development                     | 0.0007  | -7.3 | 383           | 15                   | Cdon, Smarcd3, Krt19, Met, Nupr1, Id3, Klf5, Smad6, Ramp2, Wnt2, Bcl9, Chrb1, Rcan1, Foxc1, Maml1                 |
| GO:0048514 | blood vessel morphogenesis                       | 0.0007  | -7.2 | 346           | 14                   | Sema5a, Plau, Rhob, Pdgfa, Figf, Klf5, Smad6, Ovol2, Ramp2, Vash1, EphA1, Foxc1, Wnt7a, Tgfbr1                    |
| GO:0032388 | positive regulation of intracellular transport   | 0.0008  | -7.2 | 163           | 9                    | Sfn, Cxcl10, Sema5a, Cdh1, Ehd2, Gper1, Wipf1, Tgfb3, Tgfbr1                                                      |
| GO:0048565 | digestive tract development                      | 0.0008  | -7.1 | 102           | 7                    | Ovol2, Pkdcc, Cdh1, Stx2, Pdgfa, Sav1, Klf5                                                                       |
| GO:0010632 | regulation of epithelial cell migration          | 0.0010  | -6.9 | 105           | 7                    | Itga2, Vash1, Tacstd2, Sox9, Mcc, Ctsh, Gata3                                                                     |
| GO:0006140 | regulation of nucleotide metabolic process       | 0.0010  | -6.9 | 483           | 17                   | Cda, Ppif, Arap2, EphA1, Tbc1d2, Fzd2, Cxcl10, Ocl, Cd40, Ece1, Palm, Gper1, Ramp2, Pkd2, Mcf2l, Dennd2a, Arhgap8 |
| GO:0042306 | regulation of protein import into nucleus        | 0.0010  | -6.9 | 136           | 8                    | Pkia, Sema5a, Cdh1, Apc2, Cdkn1a, Pkd2, Tgfb3, Tgfbr1                                                             |
| GO:0014812 | muscle cell migration                            | 0.0011  | -6.9 | 14            | 3                    | Ddr1, Plau, Met                                                                                                   |

| TermID     | Term                                                      | p-value | logP | Genes in Term | Target Genes in Term | Gene Symbols                                                                                                |
|------------|-----------------------------------------------------------|---------|------|---------------|----------------------|-------------------------------------------------------------------------------------------------------------|
| GO:0060037 | pharyngeal system development                             | 0.0011  | -6.9 | 14            | 3                    | Ece1, Tgfb1, Gata3                                                                                          |
| GO:0046165 | alcohol biosynthetic process                              | 0.0011  | -6.8 | 78            | 6                    | Mvd, Hmgcr, Sc4mol, Sgms2, Pmvk, Pemt                                                                       |
| GO:0090287 | regulation of cellular response to growth factor stimulus | 0.0011  | -6.8 | 138           | 8                    | Fam20c, Figf, Zeb1, Smad6, Tgfb3, Tgfb1i1, Grb10, Gata3                                                     |
| GO:0040007 | growth                                                    | 0.0011  | -6.8 | 361           | 14                   | Thbs3, Pkdcc, Nupr1, Plau, Grhl2, Lepre1, Bnc2, Tgfb3, Bcl9, Map7, Sox9, Wnt7a, Foxc1, Gata3                |
| GO:0048705 | skeletal system morphogenesis                             | 0.0011  | -6.8 | 207           | 10                   | Thbs3, Csrnp1, Grhl2, Bnc2, Zeb1, Tgfb3, Sox9, Twist2, Wnt7a, Tgfb1                                         |
| GO:0003231 | cardiac ventricle development                             | 0.0012  | -6.8 | 108           | 7                    | Fzd2, Smarcd3, Grhl2, Cpe, Sav1, Foxc1, Gata3                                                               |
| GO:0044087 | regulation of cellular component biogenesis               | 0.0012  | -6.7 | 406           | 15                   | Prkch, Stxbp1, Cand1, Fam110c, Palm, Klf5, Kank3, Smad6, Tgfb3, Epha1, Nedd4l, Tacstd2, Wnt7a, Stub1, Tgfb1 |
| GO:0016126 | sterol biosynthetic process                               | 0.0012  | -6.7 | 32            | 4                    | Mvd, Hmgcr, Sc4mol, Pmvk                                                                                    |
| GO:2000008 | regulation of protein localization to cell surface        | 0.0013  | -6.6 | 15            | 3                    | Nedd4l, Cdh1, Rab11fip5                                                                                     |
| GO:0046824 | positive regulation of nucleocytoplasmic transport        | 0.0013  | -6.6 | 81            | 6                    | Tgfb3, Sfn, Sema5a, Cdh1, Tgfb1, Wip1                                                                       |
| GO:0042692 | muscle cell differentiation                               | 0.0014  | -6.6 | 213           | 10                   | Cdon, Smarcd3, Krt19, Met, Smad6, Ramp2, Bcl9, Chrn1, Rcan1, Maml1                                          |
| GO:0055123 | digestive system development                              | 0.0014  | -6.5 | 112           | 7                    | Ovol2, Pkdcc, Cdh1, Stx2, Pdgfa, Sav1, Klf5                                                                 |
| GO:0010830 | regulation of myotube differentiation                     | 0.0014  | -6.5 | 56            | 5                    | Cdon, Ehd2, Sox9, Id3, Maml1                                                                                |
| GO:0001525 | angiogenesis                                              | 0.0015  | -6.5 | 252           | 11                   | Sema5a, Plau, Rhob, Pdgfa, Figf, Klf5, Ovol2, Ramp2, Vash1, Epha1, Tgfb1                                    |
| GO:1900180 | regulation of protein localization to nucleus             | 0.0015  | -6.5 | 145           | 8                    | Pkia, Sema5a, Cdh1, Apc2, Cdkn1a, Pkd2, Tgfb3, Tgfb1                                                        |
| GO:0090102 | cochlea development                                       | 0.0016  | -6.5 | 34            | 4                    | Fzd2, Cdh1, Sox9, Zeb1                                                                                      |
| GO:0043403 | skeletal muscle tissue regeneration                       | 0.0016  | -6.5 | 16            | 3                    | Bcl9, Plau, Wnt7a                                                                                           |
| GO:0060575 | intestinal epithelial cell differentiation                | 0.0016  | -6.5 | 16            | 3                    | Cdh1, Sav1, Klf5                                                                                            |
| GO:2000352 | negative regulation of endothelial cell apoptotic process | 0.0016  | -6.5 | 16            | 3                    | Ramp2, Sema5a, Gata3                                                                                        |
| GO:0048568 | embryonic organ development                               | 0.0016  | -6.4 | 418           | 15                   | Fzd2, Pkdcc, Krt19, Tmie, Grhl2, Zeb1, Ovol2, Wnt2, Tgfb3, Pkd2, Sox9, Twist2, Foxc1, Gata3, Tgfb1          |
| GO:0006970 | response to osmotic stress                                | 0.0017  | -6.4 | 58            | 5                    | Itga2, Mapk13, Pkd2, Nedd4l, Map7                                                                           |
| GO:0010942 | positive regulation of cell death                         | 0.0017  | -6.4 | 379           | 14                   | Ddit4, Nupr1, Cd40, Rhob, Sav1, Gper1, Id3, Casp7, Cdkn1a, Ppif, Tgfb3, Hmgcr, Anxa1, Apbb2                 |
| GO:1902580 | single-organism cellular localization                     | 0.0018  | -6.3 | 220           | 10                   | Cdh1, Ehd2, Fermt2, Fgf13, Palm, Krt18, Ramp2, Map7, Cpe, Ramp3                                             |
| GO:1902578 | single-organism localization                              | 0.0018  | -6.3 | 220           | 10                   | Cdh1, Ehd2, Fermt2, Fgf13, Palm, Krt18, Ramp2, Map7, Cpe, Ramp3                                             |
| GO:1901617 | organic hydroxy compound biosynthetic process             | 0.0018  | -6.3 | 116           | 7                    | Mvd, Hmgcr, Sc4mol, Sgms2, Pmvk, Pemt, Gata3                                                                |
| GO:0030799 | regulation of cyclic nucleotide metabolic process         | 0.0019  | -6.3 | 117           | 7                    | Ramp2, Pkd2, Fzd2, Cxcl10, Ece1, Palm, Gper1                                                                |
| GO:0030178 | negative regulation of Wnt signaling pathway              | 0.0019  | -6.2 | 118           | 7                    | Cdh1, Sox9, Apcdd1, Apc2, Grb10, Mcc, Dkk3                                                                  |
| GO:0042303 | molting cycle                                             | 0.0021  | -6.1 | 89            | 6                    | Prss8, Sox9, Pdgfa, Mpzl3, Apcdd1, Sav1                                                                     |

| TermID     | Term                                                          | p-value | logP | Genes in Term | Target Genes in Term | Gene Symbols                                                                                                   |
|------------|---------------------------------------------------------------|---------|------|---------------|----------------------|----------------------------------------------------------------------------------------------------------------|
| GO:0042633 | hair cycle                                                    | 0.0021  | -6.1 | 89            | 6                    | Prss8, Sox9, Pdgfa, Mpzl3, Apcdd1, Sav1                                                                        |
| GO:0002009 | morphogenesis of an epithelium                                | 0.0022  | -6.1 | 388           | 14                   | Sema5a, Met, Grhl2, Ovol2, Pkd2, Ripk4, Tgfb1i1, Ddr1, Tnc, Krt17, Sox9, Wnt7a, Ctsh, Gata3                    |
| GO:1900542 | regulation of purine nucleotide metabolic process             | 0.0023  | -6.1 | 478           | 16                   | Ppif, Arap2, Epha1, Tbc1d2, Fzd2, Cxcl10, Cd40, Oclrl, Ece1, Palm, Gper1, Ramp2, Pkd2, Mcf2l, Dennd2a, Arhgap8 |
| GO:0042312 | regulation of vasodilation                                    | 0.0024  | -6.0 | 38            | 4                    | Hmgcr, Ece1, Gper1, Smad6                                                                                      |
| GO:0061024 | membrane organization                                         | 0.0025  | -6.0 | 395           | 14                   | Cdh1, Ehd2, Fermt2, Dysf, Fgf13, Palm, Gper1, Krt18, Ramp2, Ppif, Chrn1, Map7, Cpe, Ramp3                      |
| GO:0030111 | regulation of Wnt signaling pathway                           | 0.0026  | -6.0 | 194           | 9                    | Cdh1, Apcdd1, Apc2, Wnt2, Sox9, Grb10, Mcc, Dkk3, Wnt7a                                                        |
| GO:0032413 | negative regulation of ion transmembrane transporter activity | 0.0026  | -5.9 | 19            | 3                    | Pkd2, Nedd4l, Gsto1                                                                                            |
| GO:2001259 | positive regulation of cation channel activity                | 0.0026  | -5.9 | 19            | 3                    | Pkd2, Nedd4l, Gsto1                                                                                            |
| GO:0048608 | reproductive structure development                            | 0.0027  | -5.9 | 233           | 10                   | Fzd2, Serpinb6b, Nupr1, Pcyt1b, Tnc, Sox9, Map7, Wnt7a, Foxc1, Gata3                                           |
| GO:0030198 | extracellular matrix organization                             | 0.0028  | -5.9 | 160           | 8                    | Lepre1, Col4a3, Ramp2, Sox9, Mpzl3, Foxc1, Tgfb1, Apbb2                                                        |
| GO:0014031 | mesenchymal cell development                                  | 0.0028  | -5.9 | 94            | 6                    | Ovol2, Fam101b, Wnt2, Sox9, Foxc1, Tgfb1                                                                       |
| GO:0030814 | regulation of cAMP metabolic process                          | 0.0028  | -5.9 | 94            | 6                    | Ramp2, Pkd2, Cxcl10, Ece1, Palm, Gper1                                                                         |
| GO:0045216 | cell-cell junction organization                               | 0.0028  | -5.9 | 94            | 6                    | Ramp2, Marveld3, Ocln, Tgfb3, Cdh1, Fermt2                                                                     |
| GO:0014902 | myotube differentiation                                       | 0.0029  | -5.9 | 40            | 4                    | Cdon, Bcl9, Met, Rcan1                                                                                         |
| GO:0043062 | extracellular structure organization                          | 0.0029  | -5.8 | 161           | 8                    | Lepre1, Col4a3, Ramp2, Sox9, Mpzl3, Foxc1, Tgfb1, Apbb2                                                        |
| GO:0030856 | regulation of epithelial cell differentiation                 | 0.0030  | -5.8 | 95            | 6                    | Prkch, Ovol2, Sox9, Zeb1, Gata3, Tgfb1                                                                         |
| GO:0061458 | reproductive system development                               | 0.0031  | -5.8 | 238           | 10                   | Fzd2, Nupr1, Serpinb6b, Pcyt1b, Tnc, Map7, Sox9, Foxc1, Wnt7a, Gata3                                           |
| GO:0010563 | negative regulation of phosphorus metabolic process           | 0.0033  | -5.7 | 321           | 12                   | Pkia, Ddit4, Cda, Met, Pdgfa, Palm, Smad6, Cdkn1a, Ppif, Hmgcr, Epha1, Grb10                                   |
| GO:0045936 | negative regulation of phosphate metabolic process            | 0.0033  | -5.7 | 321           | 12                   | Pkia, Ddit4, Cda, Met, Pdgfa, Palm, Smad6, Cdkn1a, Ppif, Hmgcr, Epha1, Grb10                                   |
| GO:0008406 | gonad development                                             | 0.0034  | -5.7 | 165           | 8                    | Fzd2, Serpinb6b, Nupr1, Pcyt1b, Map7, Sox9, Foxc1, Gata3                                                       |
| GO:0060324 | face development                                              | 0.0034  | -5.7 | 42            | 4                    | Tgfb3, Csrnp1, Grhl2, Twist2                                                                                   |
| GO:0060485 | mesenchyme development                                        | 0.0035  | -5.7 | 131           | 7                    | Ovol2, Fam101b, Wnt2, Sox9, Bnc2, Foxc1, Tgfb1                                                                 |
| GO:0045684 | positive regulation of epidermis development                  | 0.0036  | -5.6 | 21            | 3                    | Prkch, Tmem79, Krt17                                                                                           |
| GO:0045109 | intermediate filament organization                            | 0.0036  | -5.6 | 21            | 3                    | Krt20, Krt17, Vim                                                                                              |
| GO:0048562 | embryonic organ morphogenesis                                 | 0.0036  | -5.6 | 283           | 11                   | Fzd2, Tmie, Grhl2, Zeb1, Ovol2, Pkd2, Tgfb3, Sox9, Twist2, Gata3, Tgfb1                                        |
| GO:0043627 | response to estrogen                                          | 0.0036  | -5.6 | 99            | 6                    | Tgfb3, Sprr2g, Wnt7a, Gper1, Tgfb1, Ramp3                                                                      |
| GO:0003208 | cardiac ventricle morphogenesis                               | 0.0036  | -5.6 | 69            | 5                    | Smarcd3, Grhl2, Foxc1, Cpe, Gata3                                                                              |

| TermID     | Term                                                               | p-value | logP | Genes in Term | Target Genes in Term | Gene Symbols                                                                                       |
|------------|--------------------------------------------------------------------|---------|------|---------------|----------------------|----------------------------------------------------------------------------------------------------|
| GO:0048145 | regulation of fibroblast proliferation                             | 0.0036  | -5.6 | 69            | 5                    | Cdkn1a, Wnt2, Nupr1, Fosl2, Pdgfa                                                                  |
| GO:0034329 | cell junction assembly                                             | 0.0036  | -5.6 | 69            | 5                    | Lama3, Ramp2, Itgb4, Cdh1, Fermt2                                                                  |
| GO:0051241 | negative regulation of multicellular organismal process            | 0.0037  | -5.6 | 368           | 13                   | Plau, Stxbp1, Klk8, Atp2a1, Pdgfa, Sav1, Smad6, Hmgcr, Tgfb3, Tacstd2, Sox9, Twist2, Gata3         |
| GO:0001837 | epithelial to mesenchymal transition                               | 0.0038  | -5.6 | 43            | 4                    | Fam101b, Wnt2, Sox9, Tgfr1                                                                         |
| GO:0010464 | regulation of mesenchymal cell proliferation                       | 0.0038  | -5.6 | 43            | 4                    | Wnt2, Sox9, Pdgfa, Zeb1                                                                            |
| GO:0048545 | response to steroid hormone                                        | 0.0040  | -5.5 | 207           | 9                    | Gper1, Agl, Sprr2g, Tgfb3, Wnt7a, Anxa1, Ramp3, Nr2c1, Tgfr1                                       |
| GO:0051147 | regulation of muscle cell differentiation                          | 0.0040  | -5.5 | 101           | 6                    | Cdon, Ehd2, Sox9, Zeb1, Id3, Maml1                                                                 |
| GO:0042246 | tissue regeneration                                                | 0.0041  | -5.5 | 22            | 3                    | Bcl9, Plau, Wnt7a                                                                                  |
| GO:0051491 | positive regulation of filopodium assembly                         | 0.0041  | -5.5 | 22            | 3                    | Tgfb3, Palm, Tgfr1                                                                                 |
| GO:0090103 | cochlea morphogenesis                                              | 0.0041  | -5.5 | 22            | 3                    | Fzd2, Sox9, Zeb1                                                                                   |
| GO:0048701 | embryonic cranial skeleton morphogenesis                           | 0.0041  | -5.5 | 44            | 4                    | Tgfb3, Grhl2, Twist2, Tgfr1                                                                        |
| GO:0045766 | positive regulation of angiogenesis                                | 0.0042  | -5.5 | 102           | 6                    | Ramp2, EphA1, Sema5a, Rhob, Cysl1r1, Ctsh                                                          |
| GO:0008277 | regulation of G-protein coupled receptor protein signaling pathway | 0.0042  | -5.5 | 102           | 6                    | Ramp2, Ece1, Palm, Gper1, Ppp1r9b, Ramp3                                                           |
| GO:0050808 | synapse organization                                               | 0.0044  | -5.4 | 103           | 6                    | Tnc, Klk8, Cdh1, Palm, Elnf1, Wnt7a                                                                |
| GO:0048146 | positive regulation of fibroblast proliferation                    | 0.0044  | -5.4 | 45            | 4                    | Cdkn1a, Wnt2, Fosl2, Pdgfa                                                                         |
| GO:0045682 | regulation of epidermis development                                | 0.0044  | -5.4 | 45            | 4                    | Prkch, Ovol2, Tmem79, Krt17                                                                        |
| GO:0070838 | divalent metal ion transport                                       | 0.0045  | -5.4 | 211           | 9                    | Bspry, Zdhhc13, Atp2a1, Ramp2, Cacnb3, Pkd2, Nipal2, Cysl1r1, Ramp3                                |
| GO:0010171 | body morphogenesis                                                 | 0.0048  | -5.3 | 46            | 4                    | Tgfb3, Cdon, Csrnp1, Twist2                                                                        |
| GO:0055001 | muscle cell development                                            | 0.0049  | -5.3 | 105           | 6                    | Ramp2, Krt19, Rcan1, Chrn1, Maml1, Smad6                                                           |
| GO:0000904 | cell morphogenesis involved in differentiation                     | 0.0050  | -5.3 | 426           | 14                   | Fam101b, Fzd2, Sema5a, Cdh1, Stxbp1, Fermt2, Flrt3, Wnt2, EphA1, Sox9, Tgfr1, Stxbp5, Apbb2, Gata3 |
| GO:0045664 | regulation of neuron differentiation                               | 0.0050  | -5.3 | 426           | 14                   | Cdon, Klk8, Met, Enc1, Fgf13, Palm, Dpysl2, Zeb1, Sox9, Wnt7a, Vim, Ntrn, Sdc2, Gata3              |
| GO:0048762 | mesenchymal cell differentiation                                   | 0.0051  | -5.3 | 106           | 6                    | Ovol2, Fam101b, Wnt2, Sox9, Foxc1, Tgfr1                                                           |
| GO:0045786 | negative regulation of cell cycle                                  | 0.0053  | -5.2 | 178           | 8                    | Nupr1, Rhob, Cdkn1a, Vash1, Pkd2, Foxc1, Apbb2, Gata3                                              |
| GO:0007169 | transmembrane receptor protein tyrosine kinase signaling pathway   | 0.0053  | -5.2 | 257           | 10                   | Ddit4, Met, Csrnp1, Figf, Pdgfa, EphA1, Ddr1, Sox9, Grb10, Foxc1                                   |
| GO:0002064 | epithelial cell development                                        | 0.0054  | -5.2 | 142           | 7                    | Tmem79, Cdh1, Sox9, Map7, Wnt7a, Klf5, Gata3                                                       |
| GO:0060828 | regulation of canonical Wnt signaling pathway                      | 0.0054  | -5.2 | 142           | 7                    | Wnt2, Cdh1, Sox9, Apc2, Mcc, Wnt7a, Dkk3                                                           |
| GO:2000736 | regulation of stem cell differentiation                            | 0.0055  | -5.2 | 76            | 5                    | Tgfb3, Tgfb1i1, Tacstd2, Sox9, Sav1                                                                |
| GO:0090316 | positive regulation of intracellular protein transport             | 0.0058  | -5.1 | 109           | 6                    | Tgfb3, Sfn, Sema5a, Cdh1, Tgfr1, Wip1                                                              |
| GO:0051224 | negative regulation of protein transport                           | 0.0058  | -5.1 | 109           | 6                    | Btn1a1, Pkd2, Pkia, Pkdcc, Apc2, Anxa1                                                             |
| GO:0030308 | negative regulation of cell growth                                 | 0.0059  | -5.1 | 144           | 7                    | Cdkn1a, Rrad, Cda, Fgf13, Tnk1, Apbb2, Ppp1r9b                                                     |
| GO:0008299 | isoprenoid biosynthetic process                                    | 0.0059  | -5.1 | 25            | 3                    | Mvd, Hmgcr, Pmvk                                                                                   |



| TermID     | Term                                                          | p-value | logP | Genes in Term | Target Genes in Term | Gene Symbols                                                                                           |
|------------|---------------------------------------------------------------|---------|------|---------------|----------------------|--------------------------------------------------------------------------------------------------------|
| GO:0045165 | cell fate commitment                                          | 0.0060  | -5.1 | 221           | 9                    | Dlx1, Cdon, Fgf13, Wnt2, Tgfb1i1, Sox9, Wnt7a, Gata3, Tgfb1                                            |
| GO:0090257 | regulation of muscle system process                           | 0.0061  | -5.1 | 145           | 7                    | Itga2, Tnni2, Nedd4l, Ece1, Atp2a1, Cald1, Gper1                                                       |
| GO:0071559 | response to transforming growth factor beta                   | 0.0061  | -5.1 | 78            | 5                    | Tgfb3, Fermt2, Sox9, Smad6, Tgfb1                                                                      |
| GO:0030801 | positive regulation of cyclic nucleotide metabolic process    | 0.0061  | -5.1 | 78            | 5                    | Ramp2, Fzd2, Cxcl10, Ece1, Gper1                                                                       |
| GO:0071560 | cellular response to transforming growth factor beta stimulus | 0.0061  | -5.1 | 78            | 5                    | Tgfb3, Sox9, Fermt2, Smad6, Tgfb1                                                                      |
| GO:0045596 | negative regulation of cell differentiation                   | 0.0064  | -5.1 | 485           | 15                   | Dlx1, Fgf13, Zeb1, Gper1, Id3, Ovol2, Meis2, Bcl9, Tgfb1i1, Tacstd2, Sox9, Twist2, Wnt7a, Gata3, Tgfb1 |
| GO:0001936 | regulation of endothelial cell proliferation                  | 0.0065  | -5.0 | 79            | 5                    | Arg1, Wnt2, Vash1, Stat1, Tgfb1                                                                        |
| GO:0071363 | cellular response to growth factor stimulus                   | 0.0066  | -5.0 | 224           | 9                    | Sparc, Ddit4, Fermt2, Smad6, Ramp2, Tgfb3, Sox9, Tgfb1, Gata3                                          |
| GO:0072511 | divalent inorganic cation transport                           | 0.0066  | -5.0 | 224           | 9                    | Bspry, Zdhhc13, Atp2a1, Ramp2, Cacnb3, Pkd2, Nipal2, Cysl1r1, Ramp3                                    |
| GO:0048708 | astrocyte differentiation                                     | 0.0066  | -5.0 | 26            | 3                    | Nfix, Sox9, Vim                                                                                        |
| GO:0061326 | renal tubule development                                      | 0.0066  | -5.0 | 26            | 3                    | Pkd2, Stat1, Sox9                                                                                      |
| GO:0001937 | negative regulation of endothelial cell proliferation         | 0.0066  | -5.0 | 26            | 3                    | Vash1, Stat1, Tgfb1                                                                                    |
| GO:0018149 | peptide cross-linking                                         | 0.0066  | -5.0 | 26            | 3                    | Sprr1a, Tgm1, Anxa1                                                                                    |
| GO:0030324 | lung development                                              | 0.0069  | -5.0 | 186           | 8                    | Sparc, Pkdcc, Grhl2, Pdgfa, Sav1, Tgfb3, Sim2, Ctsh                                                    |
| GO:0006937 | regulation of muscle contraction                              | 0.0069  | -5.0 | 113           | 6                    | Itga2, Tnni2, Nedd4l, Atp2a1, Cald1, Gper1                                                             |
| GO:0043068 | positive regulation of programmed cell death                  | 0.0069  | -5.0 | 353           | 12                   | Nupr1, Cd40, Rhob, Sav1, Gper1, Id3, Casp7, Cdkn1a, Tgfb3, Hmgcr, Anxa1, Apbb2                         |
| GO:0051056 | regulation of small GTPase mediated signal transduction       | 0.0071  | -5.0 | 354           | 12                   | Rgl1, Cdon, Ocrl, Fgd6, Cd40, Arap2, Mcf2l, Eph1, Tbc1d2, Dennd2a, Tnk1, Arhgap8                       |
| GO:0030323 | respiratory tube development                                  | 0.0073  | -4.9 | 188           | 8                    | Sparc, Pkdcc, Grhl2, Pdgfa, Sav1, Tgfb3, Sim2, Ctsh                                                    |
| GO:0007044 | cell-substrate junction assembly                              | 0.0073  | -4.9 | 27            | 3                    | Lama3, Itgb4, Fermt2                                                                                   |
| GO:0006695 | cholesterol biosynthetic process                              | 0.0073  | -4.9 | 27            | 3                    | Mvd, Hmgcr, Pmvk                                                                                       |
| GO:0090183 | regulation of kidney development                              | 0.0074  | -4.9 | 52            | 4                    | Tacstd2, Sox9, Pdgfa, Gata3                                                                            |
| GO:0021700 | developmental maturation                                      | 0.0075  | -4.9 | 189           | 8                    | Thbs3, Tmem79, Stxbp1, Fam20c, Palm, Ntn4, Gata3, Tdrd5                                                |
| GO:0031099 | regeneration                                                  | 0.0079  | -4.8 | 53            | 4                    | Bcl9, Tnc, Plau, Wnt7a                                                                                 |
| GO:0045981 | positive regulation of nucleotide metabolic process           | 0.0080  | -4.8 | 83            | 5                    | Ramp2, Fzd2, Cxcl10, Ece1, Gper1                                                                       |
| GO:0001942 | hair follicle development                                     | 0.0080  | -4.8 | 83            | 5                    | Prss8, Sox9, Apcdd1, Pdgfa, Sav1                                                                       |
| GO:0051153 | regulation of striated muscle cell differentiation            | 0.0080  | -4.8 | 83            | 5                    | Cdon, Ehd2, Sox9, Id3, Maml1                                                                           |
| GO:1900544 | positive regulation of purine nucleotide metabolic process    | 0.0080  | -4.8 | 83            | 5                    | Ramp2, Fzd2, Cxcl10, Ece1, Gper1                                                                       |
| GO:0045137 | development of primary sexual characteristics                 | 0.0082  | -4.8 | 192           | 8                    | Fzd2, Serpinb6b, Nupr1, Pcyt1b, Map7, Sox9, Foxc1, Gata3                                               |
| GO:0051146 | striated muscle cell differentiation                          | 0.0084  | -4.8 | 154           | 7                    | Cdon, Bcl9, Krt19, Met, Rcan1, Chrn1, Maml1                                                            |
| GO:0022405 | hair cycle process                                            | 0.0084  | -4.8 | 84            | 5                    | Prss8, Sox9, Pdgfa, Apcdd1, Sav1                                                                       |

| TermID     | Term                                                                                  | p-value | logP | Genes in Term | Target Genes in Term | Gene Symbols                                                                               |
|------------|---------------------------------------------------------------------------------------|---------|------|---------------|----------------------|--------------------------------------------------------------------------------------------|
| GO:0022404 | molting cycle process                                                                 | 0.0084  | -4.8 | 84            | 5                    | Prss8, Sox9, Pdgfa, Apcdd1, Sav1                                                           |
| GO:0007517 | muscle organ development                                                              | 0.0084  | -4.8 | 233           | 9                    | Cdon, Met, Nupr1, Id3, Klf5, Wnt2, Bcl9, Rcan1, Foxc1                                      |
| GO:0070848 | response to growth factor                                                             | 0.0084  | -4.8 | 233           | 9                    | Sparc, Ddit4, Fermt2, Smad6, Ramp2, Tgfb3, Sox9, Tgfb1, Gata3                              |
| GO:0035239 | tube morphogenesis                                                                    | 0.0084  | -4.8 | 318           | 11                   | Sema5a, Met, Cdh1, Grhl2, Zeb1, Ovol2, Pkd2, Ddr1, Sox9, Ctsh, Gata3                       |
| GO:0060322 | head development                                                                      | 0.0085  | -4.8 | 54            | 4                    | Tgfb3, Csrnp1, Grhl2, Twist2                                                               |
| GO:0090090 | negative regulation of canonical Wnt signaling pathway                                | 0.0088  | -4.7 | 85            | 5                    | Cdh1, Sox9, Apc2, Mcc, Dkk3                                                                |
| GO:0031345 | negative regulation of cell projection organization                                   | 0.0088  | -4.7 | 85            | 5                    | Klk8, Tacstd2, Fgf13, Vim, Ntm                                                             |
| GO:0097305 | response to alcohol                                                                   | 0.0088  | -4.7 | 119           | 6                    | Spr2g, Cdh1, Aacs, Gper1, Tgfb1, Ramp3                                                     |
| GO:0007519 | skeletal muscle tissue development                                                    | 0.0088  | -4.7 | 119           | 6                    | Cdon, Bcl9, Met, Rcan1, Nupr1, Klf5                                                        |
| GO:0030857 | negative regulation of epithelial cell differentiation                                | 0.0089  | -4.7 | 29            | 3                    | Ovol2, Zeb1, Tgfb1                                                                         |
| GO:0071333 | cellular response to glucose stimulus                                                 | 0.0089  | -4.7 | 29            | 3                    | Aacs, Rab11fip5, Gper1                                                                     |
| GO:0048864 | stem cell development                                                                 | 0.0090  | -4.7 | 195           | 8                    | Fam101b, Ovol2, Wnt2, Bcl9, Sox9, Wnt7a, Foxc1, Tgfb1                                      |
| GO:0009880 | embryonic pattern specification                                                       | 0.0090  | -4.7 | 55            | 4                    | Sim2, Wnt7a, Smad6, Tdrd5                                                                  |
| GO:0001654 | eye development                                                                       | 0.0092  | -4.7 | 322           | 11                   | Cdon, Grhl2, Zeb1, Meis2, Sox9, Twist2, Foxc1, Vim, Gata3, Abi2, Tgfb1                     |
| GO:0072091 | regulation of stem cell proliferation                                                 | 0.0092  | -4.7 | 86            | 5                    | Wnt2, Smarcd3, Sox9, Pdgfa, Zeb1                                                           |
| GO:0009615 | response to virus                                                                     | 0.0092  | -4.7 | 157           | 7                    | Cxcl10, Ddit4, Cd40, Ifnlr1, Isg15, Ifit3, Batf3                                           |
| GO:0043010 | camera-type eye development                                                           | 0.0095  | -4.7 | 280           | 10                   | Cdon, Grhl2, Zeb1, Sox9, Twist2, Foxc1, Vim, Gata3, Abi2, Tgfb1                            |
| GO:0051051 | negative regulation of transport                                                      | 0.0096  | -4.6 | 324           | 11                   | Btn1a1, Pkia, Pkdc, Gsto1, Apc2, Ppif, Pkd2, Hmgcr, Nedd4l, Grb10, Anxa1                   |
| GO:0008283 | cell proliferation                                                                    | 0.0098  | -4.6 | 462           | 14                   | Sfn, Ddit4, Sema5a, Purb, Met, Klk8, Fgf13, Figf, Col4a3, Zbtb32, Map7, Sox9, Wnt7a, Foxc1 |
| GO:0042771 | intrinsic apoptotic signaling pathway in response to DNA damage by p53 class mediator | 0.0098  | -4.6 | 30            | 3                    | Cdkn1a, Ddit4, Nupr1                                                                       |
| GO:0007389 | pattern specification process                                                         | 0.0099  | -4.6 | 416           | 13                   | Dlx1, Sema5a, Cdon, Smarcd3, Zeb1, Smad6, Ovol2, Sim2, Pkd2, Wnt7a, Foxc1, Tgfb1, Tdrd5    |

### Supplemental Table 3 Grhl2 core target module.

Table explaining the generation of the Grhl2 core target module.

The following table contains genes that fulfill the major criteria for our Grhl2 core target set. This includes:

to be differentially expressed (control vs. KD),

to have a differential H3K4me3 ChIP peak in IMCD-3 cells intersecting with the gene body or within +500bp from TSS,

to have a Grhl2 ChIP peak in IMCD3 cells intersecting with the mentioned diff. H3K4me3 peak,

to have a ChIP peak in adult kidney intersecting with the Grhl2 ChIP peak from IMCD-3 cells.

no peak in adult kidney OR no rescue in Grhl-Res  
 no peak center related Grhl2 binding motif  
 final core target set

| Name          | Entrez ID | Down- or upreg. in KD | Successfully rescued in Grhl2-Res | Grhl2 ChIP peak occurrence consistent with Grhl2 |            |                                            |           |                 |                                                    | Motif occurrence in 50bp window |                 |                                    |          |     |          |           |
|---------------|-----------|-----------------------|-----------------------------------|--------------------------------------------------|------------|--------------------------------------------|-----------|-----------------|----------------------------------------------------|---------------------------------|-----------------|------------------------------------|----------|-----|----------|-----------|
|               |           |                       |                                   | ChIP peak in IMCD-3 cells in:                    |            | Associated Grhl2 ChIP peak in IMCD-3 cells |           |                 | Associated diff. H3K4me3 ChIP peak in IMCD-3 cells |                                 |                 | around peak summit (p-value<1e-03) |          |     |          |           |
|               |           |                       |                                   | Adult kidney                                     | E18 kidney | Start                                      | End       | MACS peak score | Start                                              | End                             | MACS peak score | p-value (FIMO)                     | Sequence |     |          |           |
| Prss22        | 70835     | DOWN                  | YES                               | YES                                              | YES        | chr17                                      | 24134882  | 24135365        | 486.88                                             | chr17                           | 24132298        | 24135860                           | 1155.62  | YES | 0.000128 | GGACCAGTC |
| Tmem54        | 66260     | DOWN                  | YES                               | YES                                              | YES        | chr4                                       | 128782536 | 128782999       | 2512.06                                            | chr4                            | 128782297       | 128784223                          | 312.3    | YES | 0.000370 | GGACCGGCT |
| 2310007B03Rik | 71874     | DOWN                  | YES                               | NO                                               | YES        | chr1                                       | 95054266  | 95054542        | 146.89                                             | chr1                            | 95053725        | 95057685                           | 1390.51  | YES | 0.000119 | AGACCAGCC |
| Rab25         | 53868     | DOWN                  | YES                               | YES                                              | YES        | chr3                                       | 88352030  | 88352452        | 347.13                                             | chr3                            | 88350717        | 88353006                           | 177.1    | YES | 0.000133 | TAACCTGTT |
| Tmem40        | 94346     | DOWN                  | YES                               | YES                                              | NO         | chr6                                       | 115708850 | 115709040       | 51.48                                              | chr6                            | 115707783       | 115710545                          | 777.65   | YES | 0.000293 | TGACCAGTC |
| Lama3         | 16774     | DOWN                  | YES                               | NO                                               | NO         | chr18                                      | 12662427  | 12662735        | 112.58                                             | chr18                           | 12660937        | 12664719                           | 787.32   | YES | 0.000750 | ATACCTGCC |
| Il17re        | 57890     | DOWN                  | YES                               | YES                                              | YES        | chr6                                       | 113408498 | 113408875       | 346.9                                              | chr6                            | 113408356       | 113409883                          | 535.47   | NO  |          |           |
| Tgm1          | 21816     | DOWN                  | YES                               | YES                                              | NO         | chr14                                      | 56332795  | 56332985        | 144.56                                             | chr14                           | 56331144        | 56334628                           | 235.74   | YES | 0.000263 | GAGCCAGTT |
| Prom2         | 192212    | DOWN                  | YES                               | YES                                              | YES        | chr2                                       | 127366959 | 127367430       | 1558.07                                            | chr2                            | 127365786       | 127367795                          | 900.57   | YES | 0.000018 | AAACCTGTC |
| Cdh1          | 12550     | DOWN                  | YES                               | YES                                              | YES        | chr8                                       | 109134806 | 109135281       | 1215.01                                            | chr8                            | 109134232       | 109135862                          | 276.33   | YES | 0.000005 | AAACCAGTT |
| Ctsh          | 13036     | DOWN                  | YES                               | YES                                              | YES        | chr9                                       | 89964274  | 89964634        | 907.72                                             | chr9                            | 89963827        | 89965216                           | 145.43   | NO  |          |           |
| Syt8          | 55925     | DOWN                  | NO                                | YES                                              | YES        | chr7                                       | 149620101 | 149620413       | 2161.46                                            | chr7                            | 149620003       | 149623228                          | 838.76   | YES | 0.000240 | TGACCAGTT |
| Arhgap40      | 545481    | DOWN                  | YES                               | YES                                              | NO         | chr2                                       | 158348878 | 158349223       | 1575.98                                            | chr2                            | 158348457       | 158349800                          | 65       | NO  |          |           |
| Sprr1a        | 20753     | DOWN                  | NO                                | NO                                               | YES        | chr3                                       | 92290303  | 92290585        | 272.11                                             | chr3                            | 92289025        | 92291064                           | 64.95    | YES | 0.000030 | AAACCTGCT |
| Mpzi3         | 319742    | DOWN                  | YES                               | YES                                              | NO         | chr9                                       | 44868176  | 44868442        | 447.43                                             | chr9                            | 44867641        | 44870275                           | 1013.82  | YES | 0.000387 | GAACCAGAT |
| Dcbld1        | 66686     | DOWN                  | YES                               | YES                                              | NO         | chr10                                      | 51997822  | 51998226        | 59.46                                              | chr10                           | 51997215        | 51998581                           | 71.25    | NO  |          |           |
| Fam110b       | 242297    | DOWN                  | YES                               | NO                                               | YES        | chr4                                       | 5695796   | 5696142         | 248.05                                             | chr4                            | 5695820         | 5697132                            | 272.84   |     | 0.000010 | AAACCTGTT |
| Ppl           | 19041     | DOWN                  | YES                               | YES                                              | YES        | chr16                                      | 5119594   | 5119928         | 687.32                                             | chr16                           | 5118800         | 5120523                            | 102.2    | YES | 0.000260 | CAACCTGCC |
| Eps811        | 67425     | DOWN                  | YES                               | YES                                              | YES        | chr7                                       | 4416901   | 4417184         | 66.19                                              | chr7                            | 4415317         | 4418035                            | 298.33   | NO  |          |           |

Grhl2 ChIP peak occurrence  
consistent with Grhl2

ChIP peak in IMCD-3

Motif occurrence in 50bp window

| Name     | Entrez ID | Down-<br>or<br>upreg.<br>in KD | Success-<br>fully<br>rescued<br>in Grhl2-<br>Res | cells in:       |               | Associated Grhl2 ChIP peak in IMCD-3 cells |           |                    | Associated diff. H3K4me3 ChIP peak in IMCD-3 ce around peak summit (p-value<1e-03) |       |                    | Motif occurrence in 50bp window |          |     |          |           |
|----------|-----------|--------------------------------|--------------------------------------------------|-----------------|---------------|--------------------------------------------|-----------|--------------------|------------------------------------------------------------------------------------|-------|--------------------|---------------------------------|----------|-----|----------|-----------|
|          |           |                                |                                                  | Adult<br>kidney | E18<br>kidney | Start                                      | End       | MACS peak<br>score | Start                                                                              | End   | MACS peak<br>score | p-value<br>(FIMO)               | Sequence |     |          |           |
| Al661453 | 224833    | DOWN                           | YES                                              | YES             | YES           | chr17                                      | 47588025  | 47588457           | 1419.88                                                                            | chr17 | 47587526           | 47589113                        | 110.4    | YES | 0.000069 | AGACCTGTC |
| Rasef    | 242505    | DOWN                           | YES                                              | YES             | YES           | chr4                                       | 73436734  | 73437120           | 1092.34                                                                            | chr4  | 73435069           | 73437509                        | 112.83   | YES | 0.000195 | GGACCTGCT |
| Ovol2    | 107586    | DOWN                           | YES                                              | YES             | YES           | chr2                                       | 144157800 | 144158064          | 1438.74                                                                            | chr2  | 144156034          | 144158556                       | 986.16   | YES | 0.000122 | GAACCGGTC |
| Otud7b   | 229603    | DOWN                           | YES                                              | NO              | NO            | chr3                                       | 95937325  | 95937653           | 54.68                                                                              | chr3  | 95936534           | 95939733                        | 70.49    | YES | 0.000312 | GAGCCAGTC |
| Apbb2    | 11787     | UP                             | YES                                              | NO              | NO            | chr5                                       | 66995044  | 66995359           | 71.29                                                                              | chr5  | 66994269           | 66995651                        | 71.78    | NO  |          |           |
| Nedd4l   | 83814     | UP                             | YES                                              | NO              | NO            | chr18                                      | 65196669  | 65197350           | 634.54                                                                             | chr18 | 65196294           | 65197210                        | 64.17    | NO  |          |           |

#### Supplemental Table 4

##### Primers used for quantitative RT-PCR.

| Gene  | Forward sequence     | Reverse sequence     |
|-------|----------------------|----------------------|
| Actb  | CTAAGGCCAACCGTGAAAAG | TCTCAGCTGTGGTGGTGAAG |
| Cdh1  | CGTCCATGTGTGACTGTG   | GGAGCCACATCATTTCGAGT |
| Cldn4 | GGCGTCTATGGGACTACAGG | GGTTGTAGAAGTCGCGGATG |
| Grhl2 | ACCATCGGGAACATTGAAGA | TCCGGTCCTCTGTAGGTTTG |
| Ovol2 | GCCACAACCAGGTAAAGAGG | TAGGTGGGACTCCAAGGAAC |
| Rab25 | CCACGATTGTTGTCATGCTC | GGTGCTGTTCTGCTTCTGCT |

#### Supplemental Table 5

##### Primers used for quantitative ChIP-PCR.

| H3K4me3 ChIP                                  | Forward sequence     | Reverse sequence      |
|-----------------------------------------------|----------------------|-----------------------|
| 0.5 kb from Ovol2 TSS                         | CAGGATCTAGGCTGGGAAAC | CACTTCCAGGCCACTTTG    |
| Chr8, negative control locus                  | ATGTGATGTGCAGTGGTGGT | CAACGTGCTCACCTCTTGTC  |
| Grhl2 ChIP                                    |                      |                       |
| -0.1 kb from Ovol2 TSS                        | AGGAAACTTGGGAGTGAGCA | GCAAACATTCATGCCTAAGGA |
| -4.4 kb from Cdh1 TSS, negative control locus | AGGAGGATTGCCCTGAAAGT | GAGAGACGGAGAAGGAACAA  |

## Supplemental References

1. Wiznerowicz, M & Trono, D: Conditional suppression of cellular genes: lentivirus vector-mediated drug-inducible RNA interference. *J Virol*, 77: 8957-61, 2003.
2. Redmer, T, Diecke, S, Grigoryan, T, Quiroga-Negreira, A, Birchmeier, W & Besser, D: E-cadherin is crucial for embryonic stem cell pluripotency and can replace OCT4 during somatic cell reprogramming. *EMBO Rep*, 12: 720-6, 2011.
3. Werth, M, Walentin, K, Aue, A, Schonheit, J, Wuebken, A, Pode-Shakked, N, Vilianovitch, L, Erdmann, B, Dekel, B, Bader, M, Barasch, J, Rosenbauer, F, Luft, FC & Schmidt-Ott, KM: The transcription factor grainyhead-like 2 regulates the molecular composition of the epithelial apical junctional complex. *Development*, 137: 3835-45, 2010.
4. Schumann, M, Gunzel, D, Buergele, N, Richter, JF, Troeger, H, May, C, Fromm, A, Sorgenfrei, D, Daum, S, Bojarski, C, Heyman, M, Zeitz, M, Fromm, M & Schulzke, JD: Cell polarity-determining proteins Par-3 and PP-1 are involved in epithelial tight junction defects in coeliac disease. *Gut*, 61: 220-8, 2011.
5. Bailey, TL & Elkan, C: Fitting a mixture model by expectation maximization to discover motifs in biopolymers. *Proc Int Conf Intell Syst Mol Biol*, 2: 28-36, 1994.
6. Bailey, TL & Gribskov, M: Combining evidence using p-values: application to sequence homology searches. *Bioinformatics*, 14: 48-54, 1998.
7. Grant, CE, Bailey, TL & Noble, WS: FIMO: scanning for occurrences of a given motif. *Bioinformatics*, 27: 1017-8, 2011.
8. Robinson, JT, Thorvaldsdottir, H, Winckler, W, Guttman, M, Lander, ES, Getz, G & Mesirov, JP: Integrative genomics viewer. *Nat Biotechnol*, 29: 24-6, 2011.
9. Thorvaldsdottir, H, Robinson, JT & Mesirov, JP: Integrative Genomics Viewer (IGV): high-performance genomics data visualization and exploration. *Brief Bioinform*, 14: 178-92, 2012.
10. Hunter, JD: Matplotlib: A 2D graphics environment. *Computing In Science & Engineering*, 9: 90-95, 2007.
11. Quinlan, AR & Hall, IM: BEDTools: a flexible suite of utilities for comparing genomic features. *Bioinformatics*, 26: 841-2, 2010.
12. Dale, RK, Pedersen, BS & Quinlan, AR: Pybedtools: a flexible Python library for manipulating genomic datasets and annotations. *Bioinformatics*, 27: 3423-4, 2011.
13. Li, H, Handsaker, B, Wysoker, A, Fennell, T, Ruan, J, Homer, N, Marth, G, Abecasis, G & Durbin, R: The Sequence Alignment/Map format and SAMtools. *Bioinformatics*, 25: 2078-9, 2009.
14. Heinz, S, Benner, C, Spann, N, Bertolino, E, Lin, YC, Laslo, P, Cheng, JX, Murre, C, Singh, H & Glass, CK: Simple combinations of lineage-determining transcription factors prime cis-regulatory elements required for macrophage and B cell identities. *Mol Cell*, 38: 576-89, 2010.
